# Supplementary material for: HIV skews the SARS-CoV-2 B cell response towards an extrafollicular maturation pathway
Source: eLife. 2022 Oct 27;11:e79924. doi: 10.7554/eLife.79924 (PMC9643005; doi:10.7554/eLife.79924)
Supplement: Source data 1. [file elife-79924-data1.xlsx]

## Sheet: Figure 1 raw data
CD19 Absolute counts					% Naïve of CD19+						% Memory of CD19+						%ASC of CD19+						%ASC of CD19+ relative to SARS-CoV-2								%ASC of CD19+ longitudinal								%ASC of CD19+ vs NLR (3 < NLR < 3)									HIV- PC:PB Ratio
PID	HIV-	HIV+ suppressed	HIV+ viremic		PID	HIV-	HIV+ supp.	HIV+ viremic	Control		PID	HIV-	HIV+ supp.	HIV+ viremic	Control		PID	HIV-	HIV+ supp.	HIV+ viremic	Control		PID	HIV+ S-CoV-2+	HIV+ S-CoV-2-	HIV- S-CoV-2+	HIV- S-CoV-2-	Control S-CoV-2-	Control S-CoV-2+		HIV- PIDs	0-6	7-13	14-20	21-27	28-34	35+		PID	Control	HIV- <3	HIV- >3	HIV+ <3	HIV+ >3	HIV+ vir. <3	HIV+ vir. >3		PID	0-6
039-02-0017	725				02-0009-2		71.1				02-0009-2		21.3				02-0009-2		5.55				039-02-0011	6.87							02-0005-1	1.24			12.9				02-1003	0.32								02-0005-1	0.666667
039-02-0022	523.26				02-0009-3		78				02-0009-3		17.4				02-0009-3		3.53				039-02-0015	11.6							02-0017-1	42.9	1.22		2.21	1.93			02-2001	0.28								02-0017-1	1.23767
039-13-0025	520.08				02-0011-3		74.5				02-0011-3		17.6				02-0011-3		6.87				039-02-0015	6.19							02-0024-1	25.6							02-2003	0.89								02-0024-1	0.28553
039-02-0022	480.6				02-0015-1		82				02-0015-1		5.77				02-0015-1		11.6				039-02-0016	10.7							02-0029-3	1.74							02-2004	6.86								02-0029-3	1.79661
039-13-0029	461.58				02-0015-2		84.1				02-0015-2		8.91				02-0015-2		6.19				039-02-0025	5.34							13-0012-1	11.6		3.46	1.15	1.02			02-2009	5.49								13-0012-1	0.916505
039-13-0012	457.53				02-0016-1			60.3			02-0016-1			27.3			02-0016-1			10.7			039-13-0004	4.75							13-0014-1	13.2	5.62	2.32					02-2010	5.29								13-0014-1	0.247163
039-13-0050	446.04				02-0016-2			70.1			02-0016-2			23.6			02-0016-2			4.58			039-13-0004	2.21							13-0023-1	13.9	4.22	3	3.59				02-2011	4.24								13-0023-1	0.257862
039-02-0022	427.147				02-0018-1		71.6				02-0018-1		18.1				02-0018-1		8.51				039-13-0009	6.11							13-0024-1	3.3	1.33						02-2012	1.6								13-0024-1	0.28553
039-13-0012	414.92				02-0018-4		34.4				02-0018-4		59.4				02-0018-4		5.38				039-13-0013	22.8							13-0029-1	23.2	1.78		3.94				02-2013	0.4								13-0029-1	1.79661
039-13-0006	414				02-0019-1			95.6			02-0019-1			2.59			02-0019-1			1.52			039-13-0028	4.56							13-0030-1	2.88	1.51						11-2006	0.53								13-0030-1	0.991837
039-13-0049	389.62				02-0019-3			84.4			02-0019-3			2.3			02-0019-3			12.5			039-13-0028	3.41							13-0041-1	4.82	3.29															13-0041-1	0.310118
039-13-0048	382.26				02-0021-1		64				02-0021-1		28.1				02-0021-1		6.79				039-13-0028	5.1							13-0043-1	4.37		2.99	10.3				039-13-0047			10.4						13-0043-1	0.400281
039-13-0058	375.41				02-0021-2		61				02-0021-2		35.2				02-0021-2		3.76				039-13-0032	1.96							13-0048-1	20.4	5.42	6.52	3.86				039-13-0047			13.4						13-0048-1	0.89272
039-02-0010	371.8				02-0025-1			66.9			02-0025-1			26.7			02-0025-1			5.34			039-13-0036	8.98							13-0055-1	1.88							039-13-0050			20.7						13-0055-1	0.285899
039-02-0014	363.54				02-0025-3		61.6				02-0025-3		32				02-0025-3		4.16				039-13-0036	1.68							13-0061-1	11.6		6.97	5.2	1.97			039-02-0005			1.24						13-0061-1	0.852886
039-02-0014	361.2				02-0025-4		53.8				02-0025-4		42.4				02-0025-4		2.32				039-13-0037	3.17							02-0013-1		5.08	1.54	1.86		1.68		039-13-0049			5.64						02-0013-1
039-02-0012	359.05				02-0025-5		65.2				02-0025-5		31.8				02-0025-5		1.55				039-13-0046	2.18							02-0014-1		20.5	5.42	5.53		4.72		039-13-0059			6.04						02-0014-1
039-13-0023	356.44				13-0003-1		67.5				13-0003-1		26.1				13-0003-1		5.71				039-13-0054	31.5							02-0022-1		2.88			3.17	1.61		039-13-0025			6.11						02-0017-2
039-13-0005	356.4				13-0003-2		69.4				13-0003-2		25				13-0003-2		4.74				039-13-0060	4.57							13-0011-1		4.22						039-02-0017			42.9						02-0022-1
039-13-0056	349.5				13-0004-1		84.3				13-0004-1		9.48				13-0004-1		4.75				039-02-0009		5.55						13-0018-2		7.84	1.72	2.11				039-13-0059			2.3						13-0011-1
039-13-0005	349.36				13-0004-2		85.8				13-0004-2		11.2				13-0004-2		2.21				039-02-0009		3.53						13-0026-1		11		6.66	2.89	2.57		039-13-0042			16						13-0014-2
039-13-0026	349.32				13-0009-1		77.4				13-0009-1		15				13-0009-1		6.11				039-02-0016		4.58						13-0034-1		46.6	4.35					039-13-0043			10.3						13-0018-2
039-13-0023	339.02				13-0009-4		69.3				13-0009-4		28.5				13-0009-4		1.3				039-02-0018		8.51						13-0038-1		11.3				5.44		039-13-0048			20.4						13-0023-2
039-13-0033	338.39				13-0009-5		68.7				13-0009-5		28.3				13-0009-5		1.66				039-02-0018		5.38						13-0040-1		1.18						039-13-0058			6.42						13-0024-2
039-02-0005	325.26				13-0009-5		82				13-0009-5		14.7				13-0009-5		1.82				039-02-0019		1.52						13-0042-1		16						039-13-0059			3.38						13-0026-1
039-13-0056	319.8				13-0010-3		80				13-0010-3		17.2				13-0010-3		1.86				039-02-0019		12.5						13-0044-2		3.51		1.86	0.92			039-02-0005			12.9						13-0029-2
039-02-0014	315.1				13-0010-5		90.1				13-0010-5		8.06				13-0010-5		1.2				039-02-0021		6.79						13-0051-1		10.9		3.19	5.14	5.9		039-13-0051			5.14						13-0030-2
039-02-0014	305.1				13-0013-2		51.6				13-0013-2		23.5				13-0013-2		22.8				039-02-0021		3.76						13-0058-1		6.42	5.39	2.46	1.98	3.18		039-13-0048			5.42						13-0034-1
039-13-0026	301.6				13-0013-3		73.5				13-0013-3		21.9				13-0013-3		3.63				039-02-0025		4.16						13-0059-1		3.01	6.04	3.38	2.3												13-0038-1
039-13-0026	298.66				13-0013-5		77.4				13-0013-5		19				13-0013-5		2.22				039-02-0025		2.32						13-0006-3			2.04		6.01			039-13-0048		6.52							13-0040-1
039-02-0014	298.2				13-0027-1		75.4				13-0027-1		11.5				13-0027-1		12.1				039-02-0025		1.55						13-0015-2			13.5	4.59	5.2			039-13-0015		13.5							13-0041-2
039-02-0017	294.58				13-0027-2		71.5				13-0027-2		14.1				13-0027-2		13.2				039-13-0003		5.71						13-0025-2			6.11		5	4.1		039-13-0015		4.59							13-0042-1
039-13-0038	292.23				13-0027-3		81.5				13-0027-3		13.8				13-0027-3		3.67				039-13-0003		4.74						13-0047-1			10.4	13.4				039-13-0058		3.18							13-0044-2
039-13-0029	285.57				13-0028-1			68.3			13-0028-1			21.9			13-0028-1			8.29			039-13-0009		1.3						13-0049-1			5.64	1.37		1.12		039-13-0030		2.88							13-0048-2
039-13-0061	282.96				13-0028-2			72.6			13-0028-2			21.2			13-0028-2			4.56			039-13-0009		1.66						13-0050-2			20.7	4.79	6.21	4.11		039-13-0030		1.51							13-0051-1
039-13-0051	281.88				13-0028-3			78.2			13-0028-3			17.5			13-0028-3			3.41			039-13-0010		1.86						13-0053-1			29.2		8	9.22		039-13-0053		11.2							13-0058-1
039-13-0058	278.64				13-0028-4			71.8			13-0028-4			22.5			13-0028-4			5.1			039-13-0010		1.2						13-0056-3			1.83	0.94				039-13-0023		3							13-0059-1
039-13-0044	275.31				13-0028-5		65.8				13-0028-5		27				13-0028-5		6.62				039-13-0013		3.63						02-0010-2				4.67	4.98	3.1		039-13-0050		4.79							02-0013-2
039-13-0012	274.8				13-0031-1		76.5				13-0031-1		18.3				13-0031-1		4.18				039-13-0013		2.22						02-0008-5				6.22		6.22		039-13-0014		5.62							02-0014-2
039-13-0005	274.72				13-0031-2		81.6				13-0031-2		14.9				13-0031-2		2.54				039-13-0027		12.1						13-0005-1						1.05		039-13-0043		2.99							13-0006-3
039-13-0030	272.09				13-0031-3		81.7				13-0031-3		16				13-0031-3		1.25				039-13-0027		13.2						13-0033-4						3.74		039-13-0038		5.44							13-0012-3
039-13-0059	269.428				13-0031-4		81.1				13-0031-4		17.6				13-0031-4		1.15				039-13-0027		3.67						HIV+ PIDs	0-6	7-13	14-20	21-27	28-34	35+		039-13-0029		1.74							13-0014-3
039-13-0005	268.932				13-0032-1		89				13-0032-1		8.52				13-0032-1		1.99				039-13-0028		8.29						02-0015-1	11.6	6.19						039-13-0034		4.35							13-0015-2
039-13-0023	262.9				13-0032-2		93.2				13-0032-2		4.36				13-0032-2		1.96				039-13-0028		6.62						02-0025-1	5.34		4.16	2.32	1.55			039-13-0029		3.94							13-0018-3
039-13-0012	257.25				13-0032-4		87.2				13-0032-4		9.1				13-0032-4		2.88				039-13-0031		4.18						13-0003-1	5.71	4.74						039-13-0029		1.82							13-0023-3
039-13-0040	256.45				13-0035-1		83.8				13-0035-1		9.96				13-0035-1		5.31				039-13-0031		2.54						13-0004-1	4.75	2.21						039-13-0058		2.46							13-0025-2
039-13-0058	253.5				13-0035-2		91.3				13-0035-2		6.06				13-0035-2		1.79				039-13-0031		1.25						13-0028-1	8.29	4.56	3.41	5.1	6.62			039-02-0017		1.22							13-0034-2
039-02-0013	245.3				13-0036-1		54.3				13-0036-1		32.6				13-0036-1		11.5				039-13-0031		1.15						13-0046-1	2.18	1.02	1.23	0.83	0.85			039-13-0049		1.37							13-0043-3
039-13-0051	244.77				13-0036-2		54				13-0036-2		35.7				13-0036-2		8.98				039-13-0032		1.99						02-0016-1		10.7	4.58					039-13-0006		2.04							13-0047-1
039-13-0050	244.2				13-0036-3		56				13-0036-3		42.2				13-0036-3		1.68				039-13-0032		2.88						02-0018-1		8.51			5.38			039-13-0061		11.6							13-0048-3
039-13-0023	243.09				13-0037-1		78.3				13-0037-1		16.9				13-0037-1		3.17				039-13-0035		5.31						02-0021-1		6.79	3.76					039-13-0056		1.83							13-0049-1
039-13-0015	241.92				13-0039-3		85.5				13-0039-3		9.84				13-0039-3		3.2				039-13-0035		1.79						13-0009-1		6.11			1.3	1.66		039-13-0026		11							13-0050-2
039-13-0041	240.9				13-0039-5		86				13-0039-5		8.6				13-0039-5		4.61				039-13-0036		11.5						13-0027-1		12.1	13.2	3.67				039-13-0023		4.22							13-0053-1
039-13-0024	238.05				13-0045-2		79.9				13-0045-2		15				13-0045-2		4.36				039-13-0039		3.2						13-0031-1		4.18	2.54	1.25	1.15			039-13-0025		4.1							13-0056-3
039-13-0048	237.39				13-0046-1		88.2				13-0046-1		8.09				13-0046-1		2.18				039-13-0039		4.61						13-0032-1		1.99	1.96		2.88			039-13-0049		1.12							13-0058-2
039-13-0024	231.54				13-0046-2		93.3				13-0046-2		4.68				13-0046-2		1.02				039-13-0045		4.36						13-0035-1		5.31	1.79					039-13-0014		2.32							13-0059-2
039-13-0030	227.8				13-0046-3		88.6				13-0046-3		9.81				13-0046-3		1.23				039-13-0046		1.02						13-0036-1		11.5	8.98	1.68				039-13-0025		5							13-0061-3
039-13-0026	222.48				13-0046-4		92.9				13-0046-4		6.12				13-0046-4		0.83				039-13-0046		1.23						13-0037-1		3.17						039-13-0058		5.39							02-0005-4
039-13-0058	214.24				13-0046-5		94.2				13-0046-5		4.87				13-0046-5		0.85				039-13-0046		0.83						13-0052-1		0.63		1.12	0.59	1.11		039-13-0033		3.74							02-0010-2
039-13-0014	213.84				13-0052-1			87.8			13-0052-1			11.5			13-0052-1			0.63			039-13-0046		0.85						13-0054-1		31.5			13.3	5.15		039-13-0006		6.01							02-0013-3
039-13-0018	212.93				13-0052-3			75.8			13-0052-3			21.8			13-0052-3			1.12			039-13-0052		0.63						02-0009-2		5.55	3.53			1.82		039-13-0055		1.88							02-0014-3
039-13-0051	210.63				13-0052-4			90.3			13-0052-4			8.48			13-0052-4			0.59			039-13-0052		1.12						13-0013-2		22.8	3.63	2.22	2.22			039-13-0034		46.6							02-0014-3
039-02-0013	208.5				13-0052-5			89.7			13-0052-5			8.58			13-0052-5			1.11			039-13-0052		0.59						13-0060-1			4.57	5.46	4.32	1.63		039-13-0023		3.59							02-0017-4
039-13-0043	204.6				13-0054-1		48.3				13-0054-1		19.7				13-0054-1		31.5				039-13-0052		1.11						13-0064-1			2.71		1.92	2.42		039-13-0043		3.29							13-0012-4
039-13-0058	200				13-0054-4		47.9				13-0054-4		37.1				13-0054-4		13.3				039-13-0054		13.3						13-0045-2			4.36					039-13-0061		6.97							13-0015-3
039-13-0018	199.98				13-0054-5		64.5				13-0054-5		29.3				13-0054-5		5.15				039-13-0054		5.15						13-0069-2			9.54	4.67	5.51	3.2		039-13-0011		4.22							13-0018-4
039-02-0024	198.97				13-0060-1		79.7				13-0060-1		15.2				13-0060-1		4.57				039-13-0060		5.46						02-0011-3			6.87					039-13-0059		3.01							13-0023-4
039-13-0049	198.72				13-0060-2		78.5				13-0060-2		15.6				13-0060-2		5.46				039-13-0060		4.32						13-0010-3			1.86		1.2			039-02-0013		5.08							13-0026-3
039-02-0012	198				13-0060-3		82.1				13-0060-3		12.8				13-0060-3		4.32				039-13-0060		4.6						13-0039-3				3.2		4.61		039-13-0048		3.86							13-0029-4
039-13-0059	196.736				13-0060-4		81.3				13-0060-4		13.4				13-0060-4		4.6				039-13-0060		1.63						02-0019-1					1.52	12.5		039-13-0058		1.98							13-0043-4
039-13-0038	196.35				13-0060-5		81.8				13-0060-5		16				13-0060-5		1.63				039-13-0064		2.71														039-13-0029		1.78							13-0044-4
039-13-0053	195.52				13-0064-1		71.8				13-0064-1		25.4				13-0064-1		2.71				039-13-0064		1.92														039-13-0044		3.51							13-0047-2
039-13-0025	195.326				13-0064-3		79.7				13-0064-3		18.1				13-0064-3		1.92				039-13-0064		1.78														039-13-0061		1.97							13-0048-4
039-13-0025	195.201				13-0064-4		76.1				13-0064-4		21.5				13-0064-4		1.78				039-13-0064		2.42														039-02-0014		4.72							13-0049-2
039-13-0050	194.175				13-0064-5		79.3				13-0064-5		17.4				13-0064-5		2.42				039-13-0069		9.54														039-02-0022		2.88							13-0050-3
039-13-0034	192.433				13-0069-2		73.4				13-0069-2		16.3				13-0069-2		9.54				039-13-0069		4.67														039-13-0023		13.9							13-0051-3
039-13-0034	191.88				13-0069-3		81				13-0069-3		13.7				13-0069-3		4.67				039-13-0069		5.51														039-02-0017		2.21							13-0056-4
039-13-0047	189.52				13-0069-4		80.4				13-0069-4		13.6				13-0069-4		5.51				039-13-0069		3.2														039-02-0014		5.42							13-0058-3
039-02-0013	189.14				13-0069-5		80.9				13-0069-5		15.2				13-0069-5		3.2				039-02-0005			1.24													039-02-0022		3.17							13-0059-3
039-13-0055	186.48				02-0005-1	77.4					02-0005-1	21					02-0005-1	1.24					039-02-0013			5.08													039-13-0012		3.46							13-0061-4
039-02-0005	184.96				02-0005-4	67.8					02-0005-4	18.4					02-0005-4	12.9					039-02-0014			20.5													039-02-0010		4.67							02-0010-3
039-02-0010	182.16				02-0008-5	76.1					02-0008-5	16.3					02-0008-5	6.22					039-02-0014			5.42													039-13-0050		4.11							02-0017-5
039-13-0048	181.44				02-0010-2	78					02-0010-2	17.2					02-0010-2	4.67					039-02-0017			42.9													039-13-0051		10.9							02-0022-4
039-02-0013	178.702				02-0010-3	44.9					02-0010-3	48.1					02-0010-3	4.98					039-02-0024			25.6													039-13-0050		6.21							13-0006-5
039-13-0050	173.4				02-0010-4	76.1					02-0010-4	19.3					02-0010-4	3.1					039-13-0011			4.22													039-02-0013		1.68							13-0012-5
039-13-0061	173.312				02-0013-1	61.4					02-0013-1	32.5					02-0013-1	5.08					039-13-0018			7.84													039-02-0010		4.98							13-0015-4
039-13-0043	173.31				02-0013-2	66.3					02-0013-2	30.3					02-0013-2	1.54					039-13-0023			13.9													039-13-0041		4.82							13-0025-4
039-13-0051	172.72				02-0013-3	65.4					02-0013-3	31.6					02-0013-3	1.86					039-13-0023			4.22													039-02-0017		1.93							13-0026-4
039-13-0049	171.963				02-0013-5	70					02-0013-5	27.8					02-0013-5	1.68					039-13-0023			3													039-13-0056		0.94							13-0044-5
039-02-0017	170.98				02-0014-1	65.6					02-0014-1	13.1					02-0014-1	20.5					039-13-0038			11.3													039-02-0014		6.09							13-0050-4
039-13-0061	168.948				02-0014-2	78					02-0014-2	15.6					02-0014-2	5.42					039-13-0042			16													039-02-0008		6.22							13-0051-4
039-13-0049	167.825				02-0014-3	77.1					02-0014-3	16.1					02-0014-3	5.53					039-13-0043			4.37													039-13-0051		3.19							13-0053-3
039-13-0029	165				02-0014-3	81.2					02-0014-3	11.6					02-0014-3	6.09					039-13-0048			20.4													039-13-0061		5.2							13-0058-4
039-13-0043	165				02-0014-5	77.4					02-0014-5	16.9					02-0014-5	4.72					039-13-0051			10.9													039-13-0018		1.72							13-0059-4
039-13-0029	164.004				02-0017-1	49.9					02-0017-1	6.12					02-0017-1	42.9					039-13-0061			11.6													039-13-0012		0.58							13-0061-5
039-02-0008	159.445				02-0017-2	58.4					02-0017-2	39					02-0017-2	1.22					039-02-0005				12.9												039-13-0043		4.37							02-0008-5
039-13-0044	159.14				02-0017-4	67.4					02-0017-4	29.3					02-0017-4	2.21					039-02-0008				6.22												039-13-0026		2.57							02-0010-4
039-13-0044	157.92				02-0017-5	77.8					02-0017-5	19.3					02-0017-5	1.93					039-02-0010				4.67												039-13-0051		5.9							02-0013-5
039-13-0011	157.884				02-0022-1	56.8					02-0022-1	38.8					02-0022-1	2.88					039-02-0010				4.98												039-02-0022		1.61							02-0014-5
039-13-0018	155.61				02-0022-4	63.2					02-0022-4	33.3					02-0022-4	3.17					039-02-0010				3.1												039-13-0053		9.22							02-0022-5
039-13-0059	155.488				02-0022-5	62.4					02-0022-5	35.4					02-0022-5	1.61					039-02-0013				1.54												039-13-0012		1.15							13-0005-1
039-13-0053	152.222				02-0024-1	62.3					02-0024-1	10.6					02-0024-1	25.6					039-02-0013				1.86												039-13-0044		0.92							13-0005-2
039-13-0059	151.844				02-0029-3	78.2					02-0029-3	18.7					02-0029-3	1.74					039-02-0013				1.68												039-13-0029		23.2							13-0005-4
039-02-0017	150.832				13-0005-1	68.8					13-0005-1	28.6					13-0005-1	1.05					039-02-0014				5.53												039-13-0024		1.33							13-0005-5
039-13-0043	149.625				13-0005-2	75.5					13-0005-2	22.2					13-0005-2	0.93					039-02-0014				6.09												039-13-0049		1.35							13-0025-5
039-02-0012	142.56				13-0005-4	87.2					13-0005-4	10.3					13-0005-4	1.53					039-02-0014				4.72												039-13-0040		1.18							13-0026-5
039-13-0029	134.97				13-0005-5	88.2					13-0005-5	8.91					13-0005-5	2.05					039-02-0017				1.22												039-13-0053		29.2							13-0033-4
039-13-0014	131.723				13-0006-3	81.3					13-0006-3	16.2					13-0006-3	2.04					039-02-0017				2.21												039-13-0005		0.93							13-0038-5
039-13-0061	121.581				13-0006-5	81.9					13-0006-5	11					13-0006-5	6.01					039-02-0017				1.93												039-13-0038		11.3							13-0049-4
039-13-0053	113.091				13-0011-1	70.3					13-0011-1	24.6					13-0011-1	4.22					039-02-0022				2.88												039-02-0014		5.53							13-0049-5
039-13-0047	111.72				13-0012-1	78.9					13-0012-1	8.49					13-0012-1	11.6					039-02-0022				3.17												039-13-0014		13.2							13-0050-5
039-13-0042	111.078				13-0012-3	85.1					13-0012-3	10.9					13-0012-3	3.46					039-02-0022				1.61												039-13-0026		2.89							13-0051-5
039-13-0048	109.252				13-0012-4	89.4					13-0012-4	8.77					13-0012-4	1.15					039-13-0005				1.05												039-13-0053		8							13-0053-4
039-13-0014	86.818				13-0012-5	90					13-0012-5	8.68					13-0012-5	0.58					039-13-0005				0.93												039-13-0026		6.66							13-0053-5
039-13-0006	85.042				13-0014-1	65.8					13-0014-1	20					13-0014-1	13.2					039-13-0005				1.53												039-13-0024		3.3							13-0058-5
039-13-0053	80.456				13-0014-2	66.1					13-0014-2	26.6					13-0014-2	5.62					039-13-0005				2.05												039-13-0044		1.86
039-13-0015	57.888				13-0014-3	71.9					13-0014-3	24.4					13-0014-3	2.32					039-13-0006				2.04												039-13-0005		2.05
039-13-0015	53.743				13-0015-2	52.4					13-0015-2	31.9					13-0015-2	13.5					039-13-0006				6.01												039-02-0010		3.1
039-02-0010	53.297				13-0015-3	64.6					13-0015-3	28.6					13-0015-3	4.59					039-13-0012				11.6												039-13-0018		2.11
039-13-0036		624.71			13-0015-4	49.2					13-0015-4	43.4					13-0015-4	5.2					039-13-0012				3.46												039-02-0014		20.5
039-13-0031		600.66			13-0018-2	75.7					13-0018-2	15.5					13-0018-2	7.84					039-13-0012				1.15												039-13-0018		7.84
039-13-0013		589.75			13-0018-3	83.9					13-0018-3	13.5					13-0018-3	1.72					039-13-0012				0.58												039-13-0005		1.53
039-13-0052			566.8		13-0018-4	88.2					13-0018-4	8.92					13-0018-4	2.11					039-13-0014				13.2												039-13-0005		1.05
039-13-0003		561.6			13-0023-1	42.4					13-0023-1	43					13-0023-1	13.9					039-13-0014				5.62												039-13-0012		11.6
039-13-0052			458.54		13-0023-2	55					13-0023-2	39.2					13-0023-2	4.22					039-13-0014				2.32
039-13-0009		414.4			13-0023-3	62.1					13-0023-3	33					13-0023-3	3					039-13-0015				13.5												039-02-0015					6.19
039-13-0052			397.8		13-0023-4	56.1					13-0023-4	38.9					13-0023-4	3.59					039-13-0015				4.59												039-02-0025							5.34
039-13-0031		379.4			13-0024-1	64.1					13-0024-1	31.7					13-0024-1	3.3					039-13-0015				5.2												039-02-0019							1.52
039-13-0009		367.84			13-0024-2	75					13-0024-2	22.5					13-0024-2	1.33					039-13-0018				1.72												039-02-0018					8.51
039-02-0009		361.1			13-0025-2	66.4					13-0025-2	25.4					13-0025-2	6.11					039-13-0018				2.11												039-13-0036					8.98
039-13-0009		354			13-0025-4	68.2					13-0025-4	25.7					13-0025-4	5					039-13-0023				3.59												039-02-0015					11.6
039-13-0003		347.6			13-0025-5	72.2					13-0025-5	22.2					13-0025-5	4.1					039-13-0024				3.3												039-13-0032					1.96
039-13-0031		333.45			13-0026-1	74.5					13-0026-1	12.9					13-0026-1	11					039-13-0024				1.33												039-13-0036					11.5
039-13-0037		314.43			13-0026-3	84.3					13-0026-3	7.97					13-0026-3	6.66					039-13-0025				6.11												039-13-0045					4.36
039-13-0032		310.2			13-0026-4	79					13-0026-4	17					13-0026-4	2.89					039-13-0025				5												039-02-0025							4.16
039-13-0013		305.9			13-0026-5	80.4					13-0026-5	15.8					13-0026-5	2.57					039-13-0025				4.1												039-13-0013					22.8
039-13-0010		296.4			13-0029-1	60.2					13-0029-1	15.6					13-0029-1	23.2					039-13-0026				11												039-02-0021					3.76
039-13-0032		282			13-0029-2	83.1					13-0029-2	13.8					13-0029-2	1.78					039-13-0026				6.66												039-13-0013					3.63
039-13-0036		279.03			13-0029-4	65.2					13-0029-4	29					13-0029-4	3.94					039-13-0026				2.89												039-13-0064					2.71
039-13-0036		277.35			13-0030-1	74.2					13-0030-1	21.8					13-0030-1	2.88					039-13-0026				2.57
039-02-0021		274.92			13-0030-2	83.8					13-0030-2	13.5					13-0030-2	1.51					039-13-0029				23.2												039-02-0019						12.5
039-13-0004		273			13-0033-4	76.4					13-0033-4	17.8					13-0033-4	3.74					039-13-0029				1.78												039-02-0009				3.53
039-02-0021		262			13-0034-1	42.7					13-0034-1	9.17					13-0034-1	46.6					039-13-0029				1.74												039-02-0025						1.55
039-13-0031		257.28			13-0034-2	67.8					13-0034-2	27					13-0034-2	4.35					039-13-0029				3.94												039-02-0021				6.79
039-13-0046		250.56			13-0038-1	64.4					13-0038-1	22.2					13-0038-1	11.3					039-13-0029				1.82												039-02-0009				5.55
039-13-0060		249.864			13-0038-5	73.7					13-0038-5	19.7					13-0038-5	5.44					039-13-0030				2.88												039-02-0025						2.32
039-13-0046		243.789			13-0040-1	92.3					13-0040-1	5.86					13-0040-1	1.18					039-13-0030				1.51												039-13-0027				13.2
039-13-0052			226.08		13-0041-1	87.7					13-0041-1	6.73					13-0041-1	4.82					039-13-0033				3.74												039-13-0028						4.56
039-13-0039		225.395			13-0041-2	77.9					13-0041-2	18.2					13-0041-2	3.29					039-13-0034				46.6												039-13-0054				13.3
039-13-0046		221.27			13-0042-1	64.1					13-0042-1	18.2					13-0042-1	16					039-13-0034				4.35												039-13-0003				5.71
039-13-0046		220.365			13-0043-1	76.4					13-0043-1	18.1					13-0043-1	4.37					039-13-0038				5.44												039-13-0013				2.22
039-13-0046		219.123			13-0043-3	72.9					13-0043-3	23.5					13-0043-3	2.99					039-13-0040				1.18												039-13-0054				31.5
039-13-0064		217.35			13-0043-4	70.2					13-0043-4	19					13-0043-4	10.3					039-13-0041				4.82												039-02-0016				10.7
039-02-0016			211.68		13-0044-2	66.5					13-0044-2	28					13-0044-2	3.51					039-13-0043				3.29												039-13-0003				4.74
039-02-0011		204.516			13-0044-4	67.7					13-0044-4	30.5					13-0044-4	1.86					039-13-0043				2.99												039-13-0039				4.61
039-13-0004		201.5			13-0044-5	61.4					13-0044-5	37.9					13-0044-5	0.92					039-13-0043				10.3												039-13-0060				4.6
039-02-0009		193.67			13-0047-1	70.1					13-0047-1	18.7					13-0047-1	10.4					039-13-0044				3.51												039-13-0032				2.88
039-02-0016			189.66		13-0047-2	74.4					13-0047-2	11.5					13-0047-2	13.4					039-13-0044				1.86												039-13-0046				0.83
039-13-0010		186.3			13-0048-1	57.4					13-0048-1	21.6					13-0048-1	20.4					039-13-0044				0.92												039-02-0018				5.38
039-13-0069		184.576			13-0048-2	69.9					13-0048-2	23.9					13-0048-2	5.42					039-13-0047				10.4												039-13-0039				3.2
039-13-0064		177.546			13-0048-3	65.7					13-0048-3	26.8					13-0048-3	6.52					039-13-0047				13.4												039-13-0028						6.62
039-13-0032		166.972			13-0048-4	68					13-0048-4	27.3					13-0048-4	3.86					039-13-0048				5.42												039-13-0052						1.12
039-13-0027		163.008			13-0049-1	87.9					13-0049-1	6.22					13-0049-1	5.64					039-13-0048				6.52												039-13-0004				2.21
039-13-0035		159.12			13-0049-2	89.7					13-0049-2	8.41					13-0049-2	1.37					039-13-0048				3.86												039-13-0046				1.23
039-13-0027		151.05			13-0049-4	92.4					13-0049-4	6.21					13-0049-4	1.12					039-13-0049				5.64												039-13-0009				1.3
039-13-0035		150.96			13-0049-5	92.5					13-0049-5	5.72					13-0049-5	1.35					039-13-0049				1.37												039-13-0028						5.1
039-02-0019			143.2		13-0050-2	62.5					13-0050-2	16.2					13-0050-2	20.7					039-13-0049				1.12												039-13-0064				2.42
039-13-0064		141.984			13-0050-3	59.5					13-0050-3	35.2					13-0050-3	4.79					039-13-0049				1.35												039-13-0031				1.25
039-13-0060		138.624			13-0050-4	62.6					13-0050-4	30.7					13-0050-4	6.21					039-13-0050				20.7												039-13-0010				1.2
039-02-0025		134.984			13-0050-5	66.4					13-0050-5	28.7					13-0050-5	4.11					039-13-0050				4.79												039-13-0054				5.15
039-02-0015		134.31			13-0051-1	61.9					13-0051-1	26.3					13-0051-1	10.9					039-13-0050				6.21												039-13-0009				6.11
039-13-0060		131.061			13-0051-3	68.2					13-0051-3	27.8					13-0051-3	3.19					039-13-0050				4.11												039-13-0009				1.66
039-13-0069		125.3			13-0051-4	67.7					13-0051-4	26.2					13-0051-4	5.14					039-13-0051				3.19												039-13-0028						3.41
039-13-0060		124.597			13-0051-5	66.3					13-0051-5	27					13-0051-5	5.9					039-13-0051				5.14												039-13-0064				1.78
039-13-0069		123.984			13-0053-1	39					13-0053-1	30.3					13-0053-1	29.2					039-13-0051				5.9												039-13-0064				1.92
039-02-0018		118.428			13-0053-3	51.7					13-0053-3	39.2					13-0053-3	8					039-13-0053				29.2												039-02-0011				6.87
039-13-0013		116.604			13-0053-4	52.4					13-0053-4	37.3					13-0053-4	9.22					039-13-0053				8												039-13-0028						8.29
039-13-0069		114.003			13-0053-5	57.4					13-0053-5	30.5					13-0053-5	11.2					039-13-0053				9.22												039-13-0035				5.31
039-02-0025		112.896			13-0055-1	84					13-0055-1	13.5					13-0055-1	1.88					039-13-0053				11.2												039-13-0004				4.75
039-13-0064		110.782			13-0056-3	83.5					13-0056-3	14.2					13-0056-3	1.83					039-13-0055				1.88												039-13-0027				12.1
039-13-0039		109.208			13-0056-4	86.3					13-0056-4	12.3					13-0056-4	0.94					039-13-0056				1.83												039-13-0046				2.18
039-02-0025			108.23		13-0058-1	67.6					13-0058-1	25.1					13-0058-1	6.42					039-13-0056				0.94												039-13-0032				1.99
039-13-0045		100.749			13-0058-2	66					13-0058-2	27.9					13-0058-2	5.39					039-13-0058				6.42												039-13-0035				1.79
039-13-0027		100.156			13-0058-3	69.2					13-0058-3	27.4					13-0058-3	2.46					039-13-0058				5.39												039-13-0031				2.54
039-02-0019			99.36		13-0058-4	69.7					13-0058-4	27.4					13-0058-4	1.98					039-13-0058				2.46												039-13-0046				0.85
039-02-0015		90.652			13-0058-5	71.4					13-0058-5	24.4					13-0058-5	3.18					039-13-0058				1.98												039-13-0069				3.2
039-13-0060		85.056			13-0059-1	83.4					13-0059-1	13.3					13-0059-1	3.01					039-13-0058				3.18												039-13-0060				4.32
039-02-0025		80.562			13-0059-2	58.2					13-0059-2	33.8					13-0059-2	6.04					039-13-0059				3.01												039-13-0046				1.02
039-13-0028			74.752		13-0059-3	84.1					13-0059-3	11.9					13-0059-3	3.38					039-13-0059				6.04												039-13-0010				1.86
039-02-0018		73.676			13-0059-4	84.5					13-0059-4	12.7					13-0059-4	2.3					039-13-0059				3.38												039-13-0031				1.15
039-13-0054		71.586			13-0061-1	59.1					13-0061-1	28.6					13-0061-1	11.6					039-13-0059				2.3												039-13-0036				1.68
039-13-0028			67.996		13-0061-3	59.1					13-0061-3	33.1					13-0061-3	6.97					039-13-0061				6.97												039-13-0069				9.54
039-13-0054		65.621			13-0061-4	53.8					13-0061-4	40.4					13-0061-4	5.2					039-13-0061				5.2												039-13-0060				4.57
039-13-0054		64.074			13-0061-5	58.6					13-0061-5	38.8					13-0061-5	1.97					039-13-0061				1.97												039-13-0031				4.18
039-13-0028			59.535																																				039-13-0060				1.63
039-13-0028			54.978		02-1003				87.6		02-1003				11.3		02-1003				0.32		02-1003					0.32											039-13-0060				5.46
039-13-0028			51.947		02-2001				86.9		02-2001				12.1		02-2001				0.28		02-2001					0.28											039-13-0027				3.67
					02-2003				92.7		02-2003				5.82		02-2003				0.89		02-2003					0.89											039-13-0052						1.11
					02-2004				77.6		02-2004				14.9		02-2004				6.86		02-2004					6.86											039-13-0069				4.67
					02-2009				77.6		02-2009				16.2		02-2009				5.49		02-2009					5.49											039-02-0016				4.58
					02-2010				78.5		02-2010				14		02-2010				5.29		02-2010					5.29											039-13-0069				5.51
					02-2011				68.2		02-2011				26.2		02-2011				4.24		02-2011					4.24											039-13-0052						0.63
					02-2012				83.5		02-2012				14		02-2012				1.6		02-2012					1.6											039-13-0052						0.59
					02-2013				79		02-2013				19.3		02-2013				0.4		02-2013					0.4
					11-2006				79.1		11-2006				19.5		11-2006				0.53		11-2006					0.53
[truncated: 9 more columns]

## Sheet: Figure 3 raw data
Switched Memory of CD19+						% CD62L+ CXCR5+ of SM						% CD62L+ CXCR5+ of SM logitudinal								% CSM of CD19+						% IgM+ Memory of CD19+						Figure supplement 1
PID	Control	HIV-	HIV+ suppressed	HIV+viremic		PID	HIV-	HIV+	HIV+vir.	Control		HIV- PIDs	0-6	7-13	14-20	21-27	28-34	35+		PID	HIV-	HIV+	HIV+vir.	Control		PID	HIV-	HIV+	HIV+vir.	Control		% CD62L+ CXCR5+ of SM longitudinal
02-1003	8.62					039-13-0052			67			039-02-0005	74.1			42.8				039-13-0052			5.57			039-13-0052			1.38			HIV- PIDs	0-6	7-13	14-20	21-27	28-34	35+
02-2001	9.19					039-13-0052			17.8			039-02-0006								039-13-0052			8.02			039-13-0052			3.15			039-02-0005	74.1			42.8
02-2003	4.96					039-13-0052			52.6			039-02-0008						69.7		039-13-0052			9.35			039-13-0052			8.07			039-02-0006
02-2004	19.5					039-13-0052			42.4			039-02-0010				80.1	54.4	50.3		039-13-0052			5.51			039-13-0052			2.36			039-02-0008						69.7
02-2009	17.6					039-13-0028			61.1			039-02-0013		80				86.9		039-13-0028			9.76			039-13-0028			16			039-02-0010				80.1	54.4	50.3
02-2010	12.4					039-02-0025			13.4			039-02-0014		33.4	56.9	64.4	62.3	76.8		039-02-0025			21.5			039-02-0025			2.68			039-02-0013		80				86.9
02-2011	20.1					039-13-0028			59.1			039-02-0017	11.3	76.5		76	82.5			039-13-0028			15			039-13-0028			6.42			039-02-0014		33.4	56.9	64.4	62.3	76.8
02-2012	11.4					039-13-0028			54.5			039-02-0020								039-13-0028			13.7			039-13-0028			3.08			039-02-0017	11.3	76.5		76	82.5
02-2013	10.3					039-13-0028			59.8			039-02-0022		81			87.6	74.8		039-13-0028			19.2			039-13-0028			1.03			039-02-0020
11-2006	12.5					039-13-0028			46.7			039-02-0023								039-13-0028			13.9			039-13-0028			5.16			039-02-0022		81			87.6	74.8
039-13-0052				6.09		039-02-0019			39.2			039-02-0024								039-02-0019			2.46			039-02-0019			0.13			039-02-0023
039-13-0052				10.2		039-02-0019			16.2			039-13-0001								039-02-0019			1.37			039-02-0019			0.91			039-02-0024
039-13-0052				7.8		039-02-0009		60				039-13-0002								039-02-0009		13.5				039-02-0009		1.5				039-13-0001
039-13-0052				6.63		039-02-0011		34.3				039-13-0005						80.2		039-02-0011		12.7				039-02-0011		4.14				039-13-0002
039-13-0028				30.7		039-02-0018		48.5				039-13-0006			73.3			46.3		039-02-0018		46.7				039-02-0018		1.42				039-13-0005						80.2
039-02-0025				25.3		039-02-0025		54.9				039-13-0007								039-02-0025		28.2				039-02-0025		1.74				039-13-0006			73.3			46.3
039-13-0028				25.4		039-02-0025		68.5				039-13-0008								039-02-0025		25.8				039-02-0025		11				039-13-0007
039-13-0028				19.6		039-02-0025		74.1				039-13-0011		62.7						039-02-0025		25.4				039-02-0025		2.18				039-13-0008
039-13-0028				27.4		039-02-0009		65.1				039-13-0012	35		62.9	77	77			039-02-0009		14.3				039-02-0009		3.16				039-13-0011		62.7
039-13-0028				20.4		039-02-0015		19.8				039-13-0014	62.6	66.6	42.1					039-02-0015		4.03				039-02-0015		0.36				039-13-0012	35		62.9	77	77
039-02-0019				4		039-02-0015		28.7				039-13-0015			51.9	65.1				039-02-0015		6.56				039-02-0015		0.57				039-13-0014	62.6	66.6	42.1
039-02-0019				14		039-13-0009		86.8				039-13-0018		50.1	44.3	63.9				039-13-0009		22.8				039-13-0009		3.33				039-13-0015			51.9	65.1
039-02-0009			15.9			039-13-0009		83.9				039-13-0020								039-13-0009		26.3				039-13-0009		0.038				039-13-0018		50.1	44.3	63.9
039-02-0011			21.6			039-02-0016		49.9				039-13-0021								039-02-0016		19.8				039-02-0016		5.5				039-13-0020
039-02-0018			46.5			039-02-0016		66.9				039-13-0023	52.3	62	76.7	74				039-02-0016		22				039-02-0016		0.17				039-13-0021
039-02-0025			27.9			039-13-0010		34.9				039-13-0024	77.4	75.2						039-13-0010		11.7				039-13-0010		3.65				039-13-0023	52.3	62	76.7	74
039-02-0025			31.6			039-13-0010		76.9				039-13-0025			60.7		69.9	77.9		039-13-0010		6.83				039-13-0010		0.067				039-13-0024	77.4	75.2
039-02-0025			23.4			039-02-0018		56.7				039-13-0026		53.8		55.3	76.9	75.9		039-02-0018		17.7				039-02-0018		0.2				039-13-0025			60.7		69.9	77.9
039-02-0009			16.3			039-02-0021		46.6				039-13-0029	34.4	9.56	82.3	73.5	70.7			039-02-0021		20.5				039-02-0021		5.17				039-13-0026		53.8		55.3	76.9	75.9
039-02-0015			13.3			039-13-0013		50.1				039-13-0030	70.6	8.36						039-13-0013		15.7				039-13-0013		5				039-13-0029	34.4	9.56	82.3	73.5	70.7
039-02-0015			11.4			039-13-0013		76.8				039-13-0033						75.5		039-13-0013		16				039-13-0013		2.13				039-13-0030	70.6	8.36
039-13-0009			23			039-02-0021		61.3				039-13-0034		79.9	73.7					039-02-0021		28.4				039-02-0021		3.9				039-13-0033						75.5
039-13-0009			23.5			039-13-0003		0				039-13-0038		44.4				72.4		039-13-0003		17.2				039-13-0003		7.22				039-13-0034		79.9	73.7
039-02-0016			32.4			039-13-0003		46.3				039-13-0040		52.4						039-13-0003		17.4				039-13-0003		5.88				039-13-0038		44.4				72.4
039-02-0016			26.6			039-13-0027		59.3				039-13-0041	49.3							039-13-0027		12.5				039-13-0027		0.53				039-13-0040		52.4
039-13-0010			14.9			039-13-0004		54.6				039-13-0042		31.3						039-13-0004		6.49				039-13-0004		1.73				039-13-0041	49.3
039-13-0010			7.65			039-13-0031		67.9				039-13-0043	64.3	77.1	74.7	43.8				039-13-0031		13.3				039-13-0031		1.06				039-13-0042		31.3
039-02-0018			22.4			039-13-0031		44.4				039-13-0044		79.5		90.4	90.5			039-13-0031		15.2				039-13-0031		1.24				039-13-0043	64.3	77.1	74.7	43.8
039-02-0021			31.2			039-13-0004		0				039-13-0047			35.7	29.2				039-13-0004		8.11				039-13-0004		1.62				039-13-0044		79.5		90.4	90.5
039-13-0013			21.6			039-13-0009		67.3				039-13-0048	48.3	64.6	64.9	68.5				039-13-0009		9.88				039-13-0009		2.91				039-13-0047			35.7	29.2
039-13-0013			14.9			039-13-0032		68.3				039-13-0049			37.7	78.5		67.7		039-13-0032		7.19				039-13-0032		1.75				039-13-0048	48.3	64.6	64.9	68.5
039-02-0021			31.9			039-13-0013		49.4				039-13-0050		25.8		46.6	52.8	75.6		039-13-0013		14.2				039-13-0013		7.07				039-13-0049			37.7	78.5		67.7
039-13-0003			26.7			039-13-0027		38.2				039-13-0051		10.6		54.7	62.4	68.1		039-13-0027		10.1				039-13-0027		1.04				039-13-0050		25.8		46.6	52.8	75.6
039-13-0003			22.4			039-13-0027		39.4				039-13-0053			32.9		70.7	67.6		039-13-0027		11.7				039-13-0027		1.37				039-13-0051		10.6		54.7	62.4	68.1
039-13-0027			15.9			039-13-0031		50.3				039-13-0055	75.2							039-13-0031		13.4				039-13-0031		3.61				039-13-0053			32.9		70.7	67.6
039-13-0004			11.4			039-13-0036		86.6				039-13-0056			59.4	72.5				039-13-0036		40.1				039-13-0036		0.06				039-13-0055	75.2
039-13-0031			12.2			039-13-0031		8.6				039-13-0057								039-13-0031		13.7				039-13-0031		0.54				039-13-0056			59.4	72.5
039-13-0031			15.6			039-13-0032		77.3				039-13-0058		60.2	48.7	79.5	89	84.1		039-13-0032		6.6				039-13-0032		1.24				039-13-0057
039-13-0004			9.81			039-13-0032		3.42				039-13-0059		40.1	59.1	77.2	42.9			039-13-0032		3.52				039-13-0032		0.59				039-13-0058		60.2	48.7	79.5	89	84.1
039-13-0009			12.7			039-13-0039		53.1				039-13-0061	50.2		70.5	78.2	54.7			039-13-0039		7.69				039-13-0039		1.62				039-13-0059		40.1	59.1	77.2	42.9
039-13-0032			9.1			039-13-0039		44.9				HIV+ PIDs	0-6	7-13	14-20	21-27	28-34	35+		039-13-0039		6.77				039-13-0039		1.51				039-13-0061	50.2		70.5	78.2	54.7
039-13-0013			35.1			039-13-0035		65.7				039-02-0009		65.1	60					039-13-0035		6.85				039-13-0035		2.31				HIV+ PIDs	0-6	7-13	14-20	21-27	28-34	35+
039-13-0027			19.9			039-13-0035		78.9				039-02-0011			34.3					039-13-0035		5.8				039-13-0035		0.053				039-02-0009		65.1	60
039-13-0027			22.4			039-13-0036		51.6				039-02-0012								039-13-0036		29.6				039-13-0036		0.31				039-02-0011			34.3
039-13-0031			18.6			039-13-0036		59.1				039-02-0015	19.8	28.7						039-13-0036		31.3				039-13-0036		1.25				039-02-0012
039-13-0036			41.5			039-13-0046		70.2				039-02-0016		49.9	66.9					039-13-0046		6.96				039-13-0046		1.12				039-02-0015	19.8	28.7
039-13-0031			14.3			039-13-0046		71.6				039-02-0018		56.7			48.5			039-13-0046		5.14				039-13-0046		0.77				039-02-0016		49.9	66.9
039-13-0032			8.81			039-13-0046		76.8				039-02-0019					39.2	16.2		039-13-0046		4.37				039-13-0046		0.26				039-02-0018		56.7			48.5
039-13-0032			7.11			039-13-0054		65.1				039-02-0021		46.6	61.3					039-13-0054		29.8				039-13-0054		3.55				039-02-0019					39.2	16.2
039-13-0039			9.3			039-13-0054		78				039-02-0025	13.4		54.9	68.5	74.1			039-13-0054		24.8				039-13-0054		2.55				039-02-0021		46.6	61.3
039-13-0039			11.6			039-13-0045		9.14				039-02-0026								039-13-0045		6.53				039-13-0045		8.42				039-02-0025	13.4		54.9	68.5	74.1
039-13-0035			16.3			039-13-0060		66.4				039-13-0003	0	46.3						039-13-0060		11				039-13-0060		1.19				039-02-0026
039-13-0035			10.3			039-13-0060		86.6				039-13-0004	54.6	0						039-13-0060		10.5				039-13-0060		2.26				039-13-0003	0	46.3
039-13-0036			38.1			039-13-0060		9.02				039-13-0009		67.3			86.8	83.9		039-13-0060		12.6				039-13-0060		2.35				039-13-0004	54.6	0
039-13-0036			40.2			039-13-0046		69.5				039-13-0010			34.9		76.9			039-13-0046		6.89				039-13-0046		0.47				039-13-0009		67.3			86.8	83.9
039-13-0046			5.63			039-13-0046		73.3				039-13-0013		49.4	50.1		76.8			039-13-0046		4.26				039-13-0046		0.25				039-13-0010			34.9		76.9
039-13-0046			6			039-13-0054		37.3				039-13-0016								039-13-0054		17.7				039-13-0054		0.16				039-13-0013		49.4	50.1		76.8
039-13-0046			4.78			039-13-0064		80.8				039-13-0017								039-13-0064		15.6				039-13-0064		0.92				039-13-0016
039-13-0054			40			039-13-0064		80.5				039-13-0019								039-13-0064		16.1				039-13-0064		3.22				039-13-0017
039-13-0054			25.8			039-13-0064		66.5				039-13-0022								039-13-0064		11.9				039-13-0064		4.47				039-13-0019
039-13-0045			18.3			039-13-0060		46.2				039-13-0027		38.2	39.4	59.3				039-13-0060		13.7				039-13-0060		0.98				039-13-0022
039-13-0060			14			039-13-0060		62.8				039-13-0028	59.8	46.7	54.5	59.1	61.1			039-13-0060		12.1				039-13-0060		3.03				039-13-0027		38.2	39.4	59.3
039-13-0060			14.9			039-13-0069		58.5				039-13-0031		50.3	8.6	67.9	44.4			039-13-0069		11.8				039-13-0069		0.44				039-13-0028	59.8	46.7	54.5	59.1	61.1
039-13-0060			13.4			039-13-0069		58.8				039-13-0032		77.3	3.42		68.3			039-13-0069		10.6				039-13-0069		2.03				039-13-0031		50.3	8.6	67.9	44.4
039-13-0046			7.53			039-13-0069		62.6				039-13-0035		65.7	78.9					039-13-0069		12.8				039-13-0069		1.01				039-13-0032		77.3	3.42		68.3
039-13-0046			4.81			039-13-0064		73.2				039-13-0036		51.6	59.1	86.6				039-13-0064		11.9				039-13-0064		10.9				039-13-0035		65.7	78.9
039-13-0054			52.1			039-13-0069		29.5				039-13-0037								039-13-0069		13				039-13-0069		1.83				039-13-0036		51.6	59.1	86.6
039-13-0064			15.9			039-02-0005	74.1					039-13-0039				53.1		44.9		039-02-0005	16.9					039-02-0005	2.88					039-13-0037
039-13-0064			16.7			039-02-0005	42.8					039-13-0045			9.14					039-02-0005	16					039-02-0005	1.51					039-13-0039				53.1		44.9
039-13-0064			15.8			039-02-0008	69.7					039-13-0046	69.5	73.3	70.2	71.6	76.8			039-02-0008	14.7					039-02-0008	0.18					039-13-0045			9.14
039-13-0060			16.1			039-02-0010	80.1					039-13-0052		17.8		52.6	42.4	67		039-02-0010	10.9					039-02-0010	3.91					039-13-0046	69.5	73.3	70.2	71.6	76.8
039-13-0060			18.7			039-02-0010	54.4					039-13-0054		37.3			65.1	78		039-02-0010	30.7					039-02-0010	11.9					039-13-0052		17.8		52.6	42.4	67
039-13-0069			14.2			039-02-0010	50.3					039-13-0060			46.2	62.8	66.4	86.6		039-02-0010	14.9					039-02-0010	1					039-13-0054		37.3			65.1	78
039-13-0069			16			039-02-0013	80					039-13-0063								039-02-0013	22.7					039-02-0013	8.82					039-13-0060			46.2	62.8	66.4	86.6
039-13-0069			17.6			039-02-0013	86.9					039-13-0064			73.2		80.8	80.5		039-02-0013	26.6					039-02-0013	0.043					039-13-0063
039-13-0064			22.6			039-02-0014	33.4					039-13-0068								039-02-0014	9.59					039-02-0014	3.01					039-13-0064			73.2		80.8	80.5
039-13-0069			21.3			039-02-0014	56.9					039-13-0069			29.5	58.5	58.8	62.6		039-02-0014	11.1					039-02-0014	3.31					039-13-0068
039-02-0005		17.1				039-02-0014	64.4													039-02-0014	15.3					039-02-0014	0.093					039-13-0069			29.5	58.5	58.8	62.6
039-02-0005		32.4				039-02-0014	62.3													039-02-0014	10.7					039-02-0014	0.12
039-02-0008		17.9				039-02-0014	76.8													039-02-0014	14.7					039-02-0014	1.04
039-02-0010		14.6				039-02-0017	11.3													039-02-0017	5.75					039-02-0017	0.015
039-02-0010		48.9				039-02-0017	76.5													039-02-0017	36.3					039-02-0017	0.14
039-02-0010		16.5				039-02-0017	76													039-02-0017	25					039-02-0017	2.56
039-02-0013		31.9				039-02-0017	82.5													039-02-0017	16.7					039-02-0017	1.99
039-02-0013		21				039-02-0022	81													039-02-0022	30.8					039-02-0022	6.12
039-02-0014		29.7				039-02-0022	87.6													039-02-0022	31.2					039-02-0022	0.58
039-02-0014		16.4				039-02-0022	74.8													039-02-0022	28.3					039-02-0022	5.99
039-02-0014		19.8				039-13-0005	80.2													039-13-0005	13.7					039-13-0005	9.44
039-02-0014		14.8				039-13-0005	78.9													039-13-0005	9.27					039-13-0005	9.06
039-02-0014		16.8				039-13-0005	76.7													039-13-0005	6.06					039-13-0005	3.13
039-02-0017		36.6				039-13-0005	50.5													039-13-0005	5.47					039-13-0005	2.46
039-02-0017		24.6				039-13-0006	73.3													039-13-0006	9.2					039-13-0006	4.68
039-02-0017		21.1				039-13-0006	46.3													039-13-0006	7.7					039-13-0006	1.51
039-02-0017		18.8				039-13-0011	62.7													039-13-0011	16.4					039-13-0011	4.17
039-02-0022		38.5				039-13-0012	35													039-13-0012	4.78					039-13-0012	2.77
039-02-0022		32.7				039-13-0012	62.9													039-13-0012	6.61					039-13-0012	3.3
039-02-0022		33.8				039-13-0012	77													039-13-0012	6.81					039-13-0012	1.26
039-13-0005		21.8				039-13-0012	77													039-13-0012	6.05					039-13-0012	2.1
039-13-0005		12.3				039-13-0014	62.6													039-13-0014	12.2					039-13-0014	7.01
039-13-0005		10.2				039-13-0014	66.6													039-13-0014	16.9					039-13-0014	6.28
039-13-0005		8.4				039-13-0014	42.1													039-13-0014	17					039-13-0014	5.46
039-13-0006		13				039-13-0015	51.9													039-13-0015	18.9					039-13-0015	9.26
039-13-0006		11.4				039-13-0015	65.1													039-13-0015	17.6					039-13-0015	6.15
039-13-0011		19.8				039-13-0018	50.1													039-13-0018	12.2					039-13-0018	2.23
039-13-0012		16.9				039-13-0018	44.3													039-13-0018	9.89					039-13-0018	2.78
039-13-0012		11.8				039-13-0018	63.9													039-13-0018	8.09					039-13-0018	0.29
039-13-0012		8.16				039-13-0023	52.3													039-13-0023	30.3					039-13-0023	9.96
039-13-0012		7.24				039-13-0023	62													039-13-0023	26.3					039-13-0023	10.3
039-13-0014		24.8				039-13-0023	76.7													039-13-0023	27.1					039-13-0023	3.79
039-13-0014		18.8				039-13-0023	74													039-13-0023	27.3					039-13-0023	9.89
039-13-0014		18.7				039-13-0024	77.4													039-13-0024	28.5					039-13-0024	1.98
039-13-0015		36.6				039-13-0024	75.2													039-13-0024	19.6					039-13-0024	1.7
039-13-0015		19.9				039-13-0025	60.7													039-13-0025	18.3					039-13-0025	4.61
039-13-0018		20.4				039-13-0025	69.9													039-13-0025	22.3					039-13-0025	1.85
039-13-0018		13				039-13-0025	77.9													039-13-0025	17.7					039-13-0025	3.31
039-13-0018		9.93				039-13-0026	53.8													039-13-0026	9.24					039-13-0026	3.26
039-13-0023		44.9				039-13-0026	55.3													039-13-0026	7.74					039-13-0026	0.028
039-13-0023		35.2				039-13-0026	76.9													039-13-0026	16.5					039-13-0026	0.022
039-13-0023		31.1				039-13-0026	75.9													039-13-0026	14.4					039-13-0026	0.71
039-13-0023		37.2				039-13-0029	34.4													039-13-0029	12					039-13-0029	2.39
039-13-0024		35.5				039-13-0029	9.56													039-13-0029	12.2					039-13-0029	1.01
039-13-0024		23.8				039-13-0029	82.3													039-13-0029	15.2					039-13-0029	2.02
039-13-0025		27				039-13-0029	73.5													039-13-0029	22.5					039-13-0029	4.94
039-13-0025		27.5				039-13-0029	70.7													039-13-0029	12.3					039-13-0029	0.92
039-13-0025		23				039-13-0030	70.6													039-13-0030	14.6					039-13-0030	6.41
039-13-0026		21.2				039-13-0030	8.36													039-13-0030	8.95					039-13-0030	4.23
039-13-0026		17.7				039-13-0033	75.5													039-13-0033	16.9					039-13-0033	0.015
039-13-0026		14.2				039-13-0034	79.9													039-13-0034	6.5					039-13-0034	1.98
039-13-0026		17.7				039-13-0034	73.7													039-13-0034	20.8					039-13-0034	3.8
039-13-0029		32.5				039-13-0038	44.4													039-13-0038	14.7					039-13-0038	4.21
039-13-0029		16.5				039-13-0038	72.4													039-13-0038	13.7					039-13-0038	3.7
039-13-0029		16.9				039-13-0040	52.4													039-13-0040	5.43					039-13-0040	0.12
039-13-0029		23.2				039-13-0041	49.3													039-13-0041	6.22					039-13-0041	0.14
039-13-0029		13.7				039-13-0042	31.3													039-13-0042	17					039-13-0042	0.17
039-13-0030		21.4				039-13-0043	64.3													039-13-0043	15.5					039-13-0043	1.56
039-13-0030		15.1				039-13-0043	77.1													039-13-0043	17.7					039-13-0043	0.2
039-13-0033		19.7				039-13-0043	74.7													039-13-0043	19.6					039-13-0043	3.09
039-13-0034		38				039-13-0043	43.8													039-13-0043	15.4					039-13-0043	3.03
039-13-0034		20.4				039-13-0044	79.5													039-13-0044	25.9					039-13-0044	0.1
039-13-0038		31.7				039-13-0044	90.4													039-13-0044	22.4					039-13-0044	5.22
039-13-0038		19				039-13-0044	90.5													039-13-0044	23.8					039-13-0044	11.2
039-13-0040		6.38				039-13-0047	35.7													039-13-0047	15.5					039-13-0047	1.61
039-13-0041		10.4				039-13-0047	29.2													039-13-0047	9.17					039-13-0047	1.66
039-13-0042		29.1				039-13-0048	48.3													039-13-0048	18.5					039-13-0048	1.48
039-13-0043		16.5				039-13-0048	64.6													039-13-0048	19.8					039-13-0048	1.33
039-13-0043		13.3				039-13-0048	64.9													039-13-0048	22.7					039-13-0048	1.71
039-13-0043		23.1				039-13-0048	68.5													039-13-0048	21.2					039-13-0048	3.31
039-13-0043		26.8				039-13-0049	37.7													039-13-0049	3.93					039-13-0049	1.97
039-13-0044		20.2				039-13-0049	78.5													039-13-0049	5.8					039-13-0049	2.5
039-13-0044		23.3				039-13-0049	67.7													039-13-0049	4.43					039-13-0049	1.46
039-13-0044		28.7				039-13-0049	80.3													039-13-0049	4.01					039-13-0049	1.47
039-13-0047		22.9				039-13-0050	25.8													039-13-0050	13.7					039-13-0050	2.39
039-13-0047		21.8				039-13-0050	46.6													039-13-0050	27.7					039-13-0050	7.28
039-13-0048		36.5				039-13-0050	52.8													039-13-0050	27					039-13-0050	3.51
039-13-0048		22.3				039-13-0050	75.6													039-13-0050	24.5					039-13-0050	3.95
039-13-0048		26.4				039-13-0051	10.6													039-13-0051	11.1					039-13-0051	14.8
039-13-0048		24				039-13-0051	54.7													039-13-0051	15.1					039-13-0051	10.9
039-13-0049		10.2				039-13-0051	62.4													039-13-0051	20.2					039-13-0051	5.01
039-13-0049		9.68				039-13-0051	68.1													039-13-0051	19.8					039-13-0051	3.39
039-13-0049		5.9				039-13-0053	32.9													039-13-0053	23.3					039-13-0053	6.51
039-13-0049		5.6				039-13-0053	70.7													039-13-0053	27.5					039-13-0053	10.7
039-13-0050		34.7				039-13-0053	67.6													039-13-0053	29.1					039-13-0053	7.39
039-13-0050		37.3				039-13-0053	73.1													039-13-0053	21.9					039-13-0053	6.21
039-13-0050		34.5				039-13-0055	75.2													039-13-0055	12.7					039-13-0055	0.058
039-13-0050		29.5				039-13-0056	59.4													039-13-0056	11.2					039-13-0056	2.01
039-13-0051		26.9				039-13-0056	72.5													039-13-0056	9.44					039-13-0056	1.44
039-13-0051		23.7				039-13-0058	60.2													039-13-0058	20.3					039-13-0058	2.19
039-13-0051		25				039-13-0058	48.7													039-13-0058	19					039-13-0058	7.78
039-13-0051		21.9				039-13-0058	79.5													039-13-0058	22.1					039-13-0058	1.59
039-13-0053		61.2				039-13-0058	89													039-13-0058	17.4					039-13-0058	5.44
039-13-0053		41.5				039-13-0058	84.1													039-13-0058	17.3					039-13-0058	3.26
039-13-0053		41.5				039-13-0059	40.1													039-13-0059	11.3					039-13-0059	1.39
039-13-0053		32.9				039-13-0059	59.1													039-13-0059	24.8					039-13-0059	5.28
039-13-0055		13.2				039-13-0059	77.2													039-13-0059	10.3					039-13-0059	0.92
039-13-0056		12.3				039-13-0059	42.9													039-13-0059	10.2					039-13-0059	1.73
039-13-0056		8.86				039-13-0061	50.2													039-13-0061	25.4					039-13-0061	2.07
039-13-0058		22.3				039-13-0061	70.5													039-13-0061	27.9					039-13-0061	4
039-13-0058		28.6				039-13-0061	78.2													039-13-0061	28.5					039-13-0061	9.76
039-13-0058		20.5				039-13-0061	54.7													039-13-0061	31					039-13-0061	6.1
039-13-0058		19.4
039-13-0058		19.3				02-1003				29.9										02-1003				11.1		02-1003				0.016
039-13-0059		13.6				02-2001				74.3										02-2001				11.9		02-2001				0.11
039-13-0059		26.3				02-2003				61.4										02-2003				5.4		02-2003				0.12
039-13-0059		12.6				02-2004				53.9										02-2004				12.3		02-2004				2.16
039-13-0059		12				02-2009				79										02-2009				14.9		02-2009				0.69
039-13-0061		33.8				02-2010				45.6										02-2010				12.5		02-2010				0.78
039-13-0061		34.7				02-2011				76.5										02-2011				24.9		02-2011				0.072
039-13-0061		38.2				02-2012				69.9										02-2012				13.6		02-2012				0.031
039-13-0061		33.7				02-2013				68.6										02-2013				17.8		02-2013				0.054
						11-2006				95.5										11-2006				18		11-2006				0.2

## Sheet: Figure 4 raw data
% DN2 of CD19+						% Ativated Naïve of CD19+						% DN2 of CD19+ longitudinal								% DN2 of CD19+ vs Disease severity score												% DN2 of CD19+ vs NLR (3<NLR<3)									% DN2 of CD19+ vs Anti-RBD IgG correlation				Figure supplement 1 A
PID	Control	HIV-	HIV+ suppressed	HIV+ viremic		PID	HIV-	HIV+	HIV+ vir.	Control		HIV- PIDs	0-6	7-13	14-20	21-27	28-34	35+		PID	HIV+ 1	HIV+ 2	HIV+ 3	HIV- 1	HIV- 2	HIV- 3	HIV+ vir. 1	HIV+ vir. 2	HIV+ vir. 3	Control		PID	Control	HIV- <3	HIV- >3	HIV+ <3	HIV+ >3	HIV+ vir. <3	HIV+ vir. >3		HIV+ viremic PIDs	RBD IgG (ng/mL)	DN2		PID	CXCR5-CD21+	CXCR5+CD21+	CXCR5+CD21-	CXCR5-CD21-
02-1003	0.82					02-1003				0.5		039-02-0005	0.59			0.68				039-13-0052							2.8					02-1003	0.82								039-02-0019	6305.43	1.27		export_Specimen_001_CD138 02-0005-4_029_DN.fcs	0.73	73.6	16	9.73
02-2001	1.33					02-2001				1.2		039-02-0006								039-13-0028							1.18					02-2001	1.33								039-02-0019	5614.65	3.03		export_Specimen_001_CD138 02-0008-5_053_DN.fcs	0.15	63.8	25.9	10.1
02-2003	0.89					02-2003				0.33		039-02-0008						1.5		039-13-0028							1.17					02-2003	0.89								039-02-0025	19938.3	7.58		export_Specimen_001_CD138 02-0009-3_047_DN.fcs	10.2	56.7	5.12	27.9
02-2004	0.76					02-2004				0.15		039-02-0010				0.94	1.16	0.072		039-13-0028							1.4					02-2004	0.76								039-13-0028	1511.95	1.09		export_Specimen_001_CD138 02-0010-3_023_DN.fcs	2.45	79.8	6.13	11.7
02-2009	1.72					02-2009				1.03		039-02-0013		1.65				1.14		039-13-0028							1.09					02-2009	1.72								039-13-0028	1723.32	0.85		export_Specimen_001_CD138 02-0010-4_038_DN.fcs	2.17	92.3	1.3	4.24
02-2010	9.14					02-2010				10.2		039-02-0014		0.85	1.1	1.39	0.91	1.29		039-13-0028							0.85					02-2010	9.14								039-13-0028	1908.5	1.4		export_Specimen_001_CD138 02-0011-3_035_DN.fcs	2.31	71.8	7.69	18.2
02-2011	1.1					02-2011				0.67		039-02-0017	0.63	0.47		0.45	0.6			039-02-0009	2.8											02-2011	1.1								039-13-0028	2218.88	1.17		export_Specimen_001_CD138 02-0012-2_029_DN.fcs	0.63	91.4	2.68	5.3
02-2012	1.03					02-2012				0.56		039-02-0020								039-02-0011	1.71											02-2012	1.03								039-13-0028	3771.09	1.18		export_Specimen_001_CD138 02-0012-4_047_DN.fcs	1.41	83.3	7.45	7.88
02-2013	0.52					02-2013				0.76		039-02-0022		1.76			1.46	1.64		039-13-0009	0.56											02-2013	0.52								039-13-0051	6143.55	4.79		export_Specimen_001_CD138 02-0012-5_038_DN.fcs	1.32	87.7	4.4	6.58
11-2006	0.64					11-2006				0.42		039-02-0023								039-13-0010	0.7											11-2006	0.64								039-13-0052	7852.39	4.11		export_Specimen_001_CD138 02-0013-5_065_DN.fcs	0.26	76	10.5	13.2
039-13-0052				2.8		039-13-0052			1.82			039-02-0024								039-13-0010	0.21																				039-13-0052	5960.49	3.51		export_Specimen_001_CD138 02-0015-1_023_DN.fcs	0.98	18.6	1.4	79
039-13-0052				4.79		039-13-0052			3.96			039-13-0001								039-02-0021	3.37											039-13-0047			1.92						039-13-0052	5713.16	2.8		export_Specimen_001_CD138 02-0015-2_041_DN.fcs	2.64	29.8	3.23	64.3
039-13-0052				4.11		039-13-0052			2.03			039-13-0002								039-13-0031	1.01											039-13-0047			1.42						HIV+ suppressed PIDs	RBD IgG (ng/mL)	DN2		export_Specimen_001_CD138 02-0016-1_023_DN.fcs	3.78	63.6	5.23	27.4
039-13-0052				3.51		039-13-0052			1.85			039-13-0005						1.39		039-13-0004	0.76											039-13-0050			0.82						039-02-0009	1505.96	2.96		export_Specimen_001_CD138 02-0016-2_089_DN.fcs	0.64	71.5	8.34	19.5
039-13-0028				1.18		039-13-0028			1.25			039-13-0006			0.6			1.46		039-13-0032	0.37											039-02-0005			0.59						039-02-0009	3693.42	2.8		export_Specimen_001_CD138 02-0017-1_077_DN.fcs	2.26	75.9	2.08	19.8
039-02-0025				7.58		039-02-0025			3.28			039-13-0007								039-13-0013	1.69											039-13-0049			0.75						039-02-0011	17301	1.71		export_Specimen_001_CD138 02-0017-2_029_DN.fcs	1.14	90.5	1.56	6.81
039-13-0028				1.17		039-13-0028			0.73			039-13-0008								039-13-0027	2.57											039-13-0059			0.98						039-02-0015	1389.51	7.26		export_Specimen_001_CD138 02-0017-4_053_DN.fcs	1.03	94.1	1.48	3.37
039-13-0028				1.4		039-13-0028			1.1			039-13-0011		0.79						039-13-0032	0.16											039-13-0025			2.03						039-02-0015	28040.5	5.68		export_Specimen_001_CD138 02-0017-5_020_DN.fcs	0.99	94.1	1.17	3.77
039-13-0028				1.09		039-13-0028			0.42			039-13-0012	0.81		0.91	0.56	1.3			039-13-0039	1.75											039-02-0017			0.63						039-02-0016	83445.6	5.78		export_Specimen_001_CD138 02-0018-1_083_DN.fcs	1.54	59.2	5.89	33.4
039-13-0028				0.85		039-13-0028			1.02			039-13-0014	0.58	1.43	0.79					039-13-0046	0.97											039-13-0059			0.55						039-02-0016	114283	6.76		export_Specimen_001_CD138 02-0018-4_080_DN.fcs	4.15	52.3	6.22	37.3
039-02-0019				1.27		039-02-0019			0.34			039-13-0015			5.78	0.54				039-13-0046	1.28											039-13-0042			4.79						039-02-0018	27889.6	9.27		export_Specimen_001_CD138 02-0019-1_032_DN.fcs	2.43	72.6	4.85	20.1
039-02-0019				3.03		039-02-0019			0.33			039-13-0018		0.97	1.1	1.53				039-13-0046	0.59											039-13-0043			0.4						039-02-0018	22603.7	0.87		export_Specimen_001_CD138 02-0019-3_038_DN.fcs	1.12	85	2.95	11
039-02-0009			2.8			039-02-0009		1.21				039-13-0020								039-13-0054	1.39											039-13-0048			0.93						039-02-0021	7007.49	2.52		export_Specimen_001_CD138 02-0021-1_050_DN.fcs	2.31	63.7	5.15	28.8
039-02-0011			1.71			039-02-0011		0.39				039-13-0021								039-13-0054	1.08											039-13-0058			1.27						039-02-0021	18872.5	3.37		export_Specimen_001_CD138 02-0021-2_020_DN.fcs	2.6	57.7	6.55	33.1
039-02-0018			0.87			039-02-0018		0.94				039-13-0023	0.91	0.9	1.05	0.73				039-13-0060	0.55											039-13-0059			1.2						039-02-0025	33519	8.46		export_Specimen_001_CD138 02-0022-1_056_DN.fcs	1.54	69.6	13.8	15.1
039-02-0025			8.46			039-02-0025		0.47				039-13-0024	0.9	0.49						039-13-0060	0.48											039-02-0005			0.68						039-02-0025	60734.8	3.59		export_Specimen_001_CD138 02-0022-4_023_DN.fcs	1.1	81	4.65	13.3
039-02-0025			3.59			039-02-0025		1.56				039-13-0025			2.03		1.77	2.29		039-13-0060	0.39											039-13-0051			0.94						039-02-0025	29975.3	5.21		export_Specimen_001_CD138 02-0022-5_026_DN.fcs	0.89	75	10.5	13.7
039-02-0025			5.21			039-02-0025		0.44				039-13-0026		1.3		0.89	1.3	1.08		039-13-0046	0.87											039-13-0048			0.93						039-13-0003	4637.92	0.53		export_Specimen_001_CD138 02-0025-1_029_DN.fcs	2.43	28.2	5.03	64.3
039-02-0009			2.96			039-02-0009		0.69				039-13-0029	0.93	0.69	0.96	0.75	3.26			039-13-0052								4.11				039-13-0048		0.77							039-13-0003	252.47	0.6		export_Specimen_001_CD138 02-0025-3_032_DN.fcs	1.31	32.5	8.08	58.1
039-02-0015			7.26			039-02-0015		1.77				039-13-0030	0.73	0.64						039-13-0052								3.51				039-13-0015		5.78							039-13-0004	240.03	0.83		export_Specimen_001_CD138 02-0025-4_020_DN.fcs	2.49	53.7	6.51	37.3
039-02-0015			5.68			039-02-0015		1.84				039-13-0033						0.44		039-02-0019								1.27				039-13-0015		0.54							039-13-0004	920.6	0.76		export_Specimen_001_CD138 02-0025-5_023_DN.fcs	0.63	44.7	12.9	41.8
039-13-0009			0.53			039-13-0009		1.32				039-13-0034		0.036	0.03					039-02-0019								3.03				039-13-0058		1.59							039-13-0009	1085.05	2.4		export_Specimen_001_CD138 02-0029-3_059_DN.fcs	0.38	84.9	7.7	6.98
039-13-0009			0.56			039-13-0009		2.25				039-13-0038		0.5				1.39		039-02-0018		0.87										039-13-0030		0.73							039-13-0009	2386.6	0.53		export_Specimen_001_CD138 13-0005-4_032_DN.fcs	1.06	83.4	8.83	6.77
039-02-0016			5.78			039-02-0016		0.19				039-13-0040		0.47						039-02-0025								8.46				039-13-0030		0.64							039-13-0009	2363.53	0.56		export_Specimen_001_CD138 13-0005-5_044_DN.fcs	0.94	81.7	9.47	7.9
039-02-0016			6.76			039-02-0016		0.9				039-13-0041	0.91							039-02-0025								3.59				039-13-0053		1.13							039-13-0010	1316.67	0.7		export_Specimen_001_CD138 13-0006-5_068_DN.fcs	2.94	60.1	13.4	23.6
039-13-0010			0.7			039-13-0010		1.21				039-13-0042		4.79						039-02-0025								5.21				039-13-0023		1.05							039-13-0010	1996.91	0.21		export_Specimen_001_CD138 13-0009-4_041_DN.fcs	2.17	83.5	2.17	12.1
039-13-0010			0.21			039-13-0010		0.64				039-13-0043	0.54	0.26	0.43	0.4				039-02-0009		2.96										039-13-0050		0.62							039-13-0013	567.75	1.69		export_Specimen_001_CD138 13-0009-5_041_DN.fcs	1.72	83	4.84	10.4
039-02-0018			9.27			039-02-0018		0.8				039-13-0044		0.74		0.36	0.42			039-13-0009		0.53										039-13-0014		1.43							039-13-0013	3546.17	1.37		export_Specimen_001_CD138 13-0009-5_053_DN.fcs	4.74	66.9	7.33	21.1
039-02-0021			2.52			039-02-0021		2.96				039-13-0047			1.92	1.42				039-02-0016		5.78										039-13-0043		0.43							039-13-0013	13594.5	1.67		export_Specimen_001_CD138 13-0010-3_041_DN.fcs	0.97	81.5	10.8	6.77
039-13-0013			1.37			039-13-0013		1.24				039-13-0048	0.93	0.93	0.77	0.67				039-02-0016		6.76										039-13-0038		1.39							039-13-0027	438.377	2.28		export_Specimen_001_CD138 13-0010-5_050_DN.fcs	0.91	92.6	3.49	2.99
039-13-0013			1.67			039-13-0013		0.32				039-13-0049			0.75	0.65		0.45		039-02-0018		9.27										039-13-0029		0.96							039-13-0027	18919.2	2.57		export_Specimen_001_CD138 13-0012-3_026_DN.fcs	2.86	86.6	2.24	8.26
039-02-0021			3.37			039-02-0021		2.36				039-13-0050		0.82		0.62	1.66	1.01		039-02-0021		2.52										039-13-0034		0.03							039-13-0027	18750.9	2.92		export_Specimen_001_CD138 13-0012-4_044_DN.fcs	1.29	88.9	3.48	6.34
039-13-0003			0.53			039-13-0003		0.59				039-13-0051		0.88		0.66	0.94	0.24		039-13-0013		1.37										039-13-0029		0.75							039-13-0031	15318.6	1.41		export_Specimen_001_CD138 13-0012-5_029_DN.fcs	1.79	82.5	3.77	11.9
039-13-0003			0.6			039-13-0003		0.23				039-13-0053			0.83		0.84	1.08		039-13-0013		1.67										039-13-0029		3.26							039-13-0031	26675.1	1.12		export_Specimen_001_CD138 13-0013-3_038_DN.fcs	2.26	84.3	2.94	10.5
039-13-0027			2.92			039-13-0027		0.67				039-13-0055	1.19							039-13-0003		0.53										039-13-0058		1.16							039-13-0031	31600.9	2.06		export_Specimen_001_CD138 13-0013-5_041_DN.fcs	1.49	80.7	5.14	12.7
039-13-0004			0.83			039-13-0004		2.75				039-13-0056			0.91	0.31				039-13-0003		0.6										039-02-0017		0.47							039-13-0031	28548.7	1.01		export_Specimen_001_CD138 13-0014-3_053_DN.fcs	2.05	85.1	3.17	9.67
039-13-0031			2.06			039-13-0031		2.43				039-13-0057								039-13-0027		2.92										039-13-0049		0.65							039-13-0032	11784.2	0.37		export_Specimen_001_CD138 13-0015-3_020_DN.fcs	1.91	76.4	4.16	17.5
039-13-0031			1.01			039-13-0031		2.18				039-13-0058		1.27	1.47	1.16	0.49	1.59		039-13-0004		0.83										039-13-0006		0.6							039-13-0032	12243.3	0.16		export_Specimen_001_CD138 13-0018-2_038_DN.fcs	1.64	79.7	5.99	12.7
039-13-0004			0.76			039-13-0004		0.38				039-13-0059		1.24	0.98	1.2	0.55			039-13-0031		2.06										039-13-0061		1.19							039-13-0032	11990.3	0.37		export_Specimen_001_CD138 13-0018-3_044_DN.fcs	2.25	76.1	5.36	16.2
039-13-0009			2.4			039-13-0009		1.25				039-13-0061	1.19		1.92	0.78	1.16			039-13-0009		2.4										039-13-0056		0.91							039-13-0035	3842.48	1.28		export_Specimen_001_CD138 13-0018-4_047_DN.fcs	2.22	80.6	4.03	13.2
039-13-0032			0.37			039-13-0032		0.76				HIV+ PIDs	0-6	7-13	14-20	21-27	28-34	35+		039-13-0027		2.28										039-13-0026		1.3							039-13-0035	6563.36	0.95		export_Specimen_001_CD138 13-0023-1_032_DN.fcs	0.87	64.4	5.9	28.8
039-13-0013			1.69			039-13-0013		0.37				039-02-0009		2.96	2.8					039-13-0031		1.41										039-13-0023		0.9							039-13-0036	17293.8	5.83		export_Specimen_001_CD138 13-0023-2_038_DN.fcs	1.79	76.7	4.45	17.1
039-13-0027			2.28			039-13-0027		1.03				039-02-0011			1.71					039-13-0036		2.63										039-13-0025		2.29							039-13-0036	24997.7	6.04		export_Specimen_001_CD138 13-0023-3_059_DN.fcs	0.71	80.3	3.18	15.8
039-13-0027			2.57			039-13-0027		4.26				039-02-0012								039-13-0031		1.12										039-13-0049		0.45							039-13-0036	33300.5	2.63		export_Specimen_001_CD138 13-0023-4_035_DN.fcs	1	66.9	4.87	27.2
039-13-0031			1.41			039-13-0031		0.46				039-02-0015	7.26	5.68						039-13-0032		0.37										039-13-0014		0.79							039-13-0037	2262.48			export_Specimen_001_CD138 13-0024-1_035_DN.fcs	1.9	69.5	6.1	22.5
039-13-0036			2.63			039-13-0036		2.22				039-02-0016		5.78	6.76					039-13-0039		1.82										039-13-0025		1.77							039-13-0039	7563.13	1.75		export_Specimen_001_CD138 13-0024-2_047_DN.fcs	2.74	81.9	3.24	12.1
039-13-0031			1.12			039-13-0031		1.34				039-02-0018		9.27			0.87			039-13-0035		1.28										039-13-0058		1.47							039-13-0044	57951.5	4.26		export_Specimen_001_CD138 13-0025-2_029_DN.fcs	1.18	73.5	2.44	22.8
039-13-0032			0.37			039-13-0032		0.33				039-02-0019					1.27	3.03		039-13-0035		0.95										039-13-0033		0.44							039-13-0045	16601.2	1.35		export_Specimen_001_CD138 13-0025-4_044_DN.fcs	0.65	75.1	5.73	18.5
039-13-0032			0.16			039-13-0032		2.26				039-02-0021		2.52	3.37					039-13-0036		5.83										039-13-0006		1.46							039-13-0046	13719.1	0.87		export_Specimen_001_CD138 13-0025-5_020_DN.fcs	1.62	83	3.04	12.4
039-13-0039			1.82			039-13-0039		2.67				039-02-0025	7.58		8.46	3.59	5.21			039-13-0036		6.04										039-13-0055		1.19							039-13-0046	10796.9	0.97		export_Specimen_001_CD138 13-0026-1_020_DN.fcs	1.03	80.5	1.69	16.7
039-13-0039			1.75			039-13-0039		0.22				039-02-0026								039-13-0064		2										039-13-0034		0.036							039-13-0046	6917.99	1.28		export_Specimen_001_CD138 13-0026-3_080_DN.fcs	1.11	87.9	2.22	8.8
039-13-0035			1.28			039-13-0035		0.37				039-13-0003	0.53	0.6						039-13-0064		1.45										039-13-0023		0.73							039-13-0046	6762.98	0.59		export_Specimen_001_CD138 13-0026-4_020_DN.fcs	0.73	85.9	2.6	10.8
039-13-0035			0.95			039-13-0035		1.72				039-13-0004	0.83	0.76						039-13-0064		2.42										039-13-0043		0.26							039-13-0053	2651.36	3.21		export_Specimen_001_CD138 13-0026-5_035_DN.fcs	0.66	83.2	1.67	14.5
039-13-0036			5.83			039-13-0036		2.01				039-13-0009		2.4			0.53	0.56		039-13-0060		0.5										039-13-0061		1.92							039-13-0054	14652.7	1.39		export_Specimen_001_CD138 13-0027-1_026_DN.fcs	3.72	62.2	5.17	28.9
039-13-0036			6.04			039-13-0036		3.3				039-13-0010			0.7		0.21			039-13-0060		0.8										039-13-0011		0.79							039-13-0054	14031.1	1.08		export_Specimen_001_CD138 13-0027-2_035_DN.fcs	3.52	61.5	4.87	30.2
039-13-0046			0.97			039-13-0046		0.86				039-13-0013		1.69	1.37		1.67			039-13-0069		3.21										039-13-0059		1.24							039-13-0059	25349.5	0.5		export_Specimen_001_CD138 13-0027-3_035_DN.fcs	1.06	71	8.81	19.1
039-13-0046			1.28			039-13-0046		1.72				039-13-0016								039-13-0069		3.51										039-02-0013		1.65							039-13-0060	24452.8	0.8		export_Specimen_001_CD138 13-0028-1_020_DN.fcs	3.14	75.7	3.92	17.3
039-13-0046			0.59			039-13-0046		1.38				039-13-0017								039-13-0069		2										039-13-0048		0.67							039-13-0060	29491.2	0.55		export_Specimen_001_CD138 13-0028-2_038_DN.fcs	6.5	65	6.5	22
039-13-0054			1.39			039-13-0054		1.32				039-13-0019								039-13-0069		1.69										039-13-0058		0.49							039-13-0060	25865.9	0.48		export_Specimen_001_CD138 13-0028-3_038_DN.fcs	1.37	71.2	14.6	12.8
039-13-0054			1.08			039-13-0054		2.3				039-13-0022								039-13-0052									4.79			039-13-0029		0.69							039-13-0060	27654.3	0.39		export_Specimen_001_CD138 13-0028-4_035_DN.fcs	2.79	76.7	3.26	17.2
039-13-0045			4.26			039-13-0045		0.45				039-13-0027		2.28	2.57	2.92				039-02-0025									7.58			039-13-0044		0.74							039-13-0061	87496.8	1.31		export_Specimen_001_CD138 13-0028-5_050_DN.fcs	0	77	9.52	13.5
039-13-0060			0.55			039-13-0060		1.41				039-13-0028	1.09	0.85	1.4	1.17	1.18			039-02-0015			7.26									039-13-0061		1.16							039-13-0064	79543	2		export_Specimen_001_CD138 13-0029-1_050_DN.fcs	3.18	80.6	4.34	11.9
039-13-0060			0.48			039-13-0060		0.68				039-13-0031		1.41	1.12	2.06	1.01			039-02-0015			5.68									039-02-0014		1.29							039-13-0064	69569.3	1.45		export_Specimen_001_CD138 13-0029-2_047_DN.fcs	0.66	89.5	3.19	6.62
039-13-0060			0.39			039-13-0060		0.58				039-13-0032		0.37	0.16		0.37			039-13-0045			4.26									039-02-0022		1.76							039-13-0064	62220.6	2.42		export_Specimen_001_CD138 13-0029-4_023_DN.fcs	1.29	89.3	2.23	7.16
039-13-0046			1.35			039-13-0046		0.57				039-13-0035		1.28	0.95					039-13-0046			1.35									039-13-0023		0.91							039-13-0064	13359.2	1.69		export_Specimen_001_CD138 13-0030-1_041_DN.fcs	2.03	85.4	6.89	5.67
039-13-0046			0.87			039-13-0046		0.75				039-13-0036		5.83	6.04	2.63				039-13-0054			3.21									039-02-0017		0.45							039-13-0069	15012	3.21		export_Specimen_001_CD138 13-0030-2_050_DN.fcs	0.27	77.6	14.2	7.97
039-13-0054			3.21			039-13-0054		0.14				039-13-0037								039-13-0064			1.31									039-02-0014		1.1							039-13-0069	16720.9	3.51		export_Specimen_001_CD138 13-0031-1_035_DN.fcs	2.14	81.6	3.65	12.6
039-13-0064			2			039-13-0064		0.8				039-13-0039				1.82		1.75		039-02-0005				0.94								039-02-0022		1.46							039-13-0069	18547.5	2		export_Specimen_001_CD138 13-0031-2_051_DN.fcs	1.13	81.4	4.88	12.6
039-13-0064			1.45			039-13-0064		0.88				039-13-0045			4.26					039-02-0005				1.16								039-13-0012		0.91							HIV- PIDs	RBD IgG (ng/mL)	DN2		export_Specimen_001_CD138 13-0031-3_026_DN.fcs	1.37	78	5.64	15
039-13-0064			2.42			039-13-0064		0.37				039-13-0046	1.35	0.87	0.97	1.28	0.59			039-02-0008				0.072								039-02-0010		0.94							039-02-0005	10404	0.59		export_Specimen_001_CD138 13-0031-4_050_DN.fcs	1.86	79.5	4.93	13.8
039-13-0060			0.5			039-13-0060		0.39				039-13-0052		4.79		4.11	3.51	2.8		039-02-0010				1.14								039-13-0050		1.01							039-02-0005	61587.7	0.68		export_Specimen_001_CD138 13-0032-1_044_DN.fcs	2.8	89.9	2.21	5.09
039-13-0060			0.8			039-13-0060		0.41				039-13-0054		3.21			1.39	1.08		039-02-0010				1.1								039-13-0051		0.88							039-02-0008	1886.66	1.5		export_Specimen_001_CD138 13-0032-2_052_DN.fcs	1.01	91.5	3.02	4.43
039-13-0069			3.21			039-13-0069		0.2				039-13-0060			0.5	0.8	0.55	0.48		039-02-0010				1.39								039-13-0050		1.66							039-02-0010	3595.43	0.94		export_Specimen_001_CD138 13-0032-4_026_DN.fcs	1.65	91	3.2	4.2
039-13-0069			3.51			039-13-0069		0.58				039-13-0063								039-02-0013				1.29								039-02-0013		1.14							039-02-0010	3543.64	1.16		export_Specimen_001_CD138 13-0033-4_068_DN.fcs	0.63	91.2	3.88	4.3
039-13-0069			2			039-13-0069		0.74				039-13-0064			1.31		2	1.45		039-02-0013				1								039-02-0010		1.16							039-02-0010	3849.28	0.072		export_Specimen_001_CD138 13-0034-1_026_DN.fcs	0.53	95.3	1.58	2.64
039-13-0064			1.31			039-13-0064		0.29				039-13-0068								039-02-0014				1.82								039-13-0041		0.91							039-02-0013	679.872	1.65		export_Specimen_001_CD138 13-0034-2_035_DN.fcs	1.26	95.1	1.15	2.52
039-13-0069			1.69			039-13-0069		2.32				039-13-0069			1.69	3.21	3.51	2		039-02-0014				0.91								039-02-0017		0.6							039-02-0013	10109.1			export_Specimen_001_CD138 13-0035-1_020_DN.fcs	1.29	81.7	4.92	12.1
039-02-0005		0.59				039-02-0005	0.32													039-02-0014				0.56								039-13-0056		0.31							039-02-0013	11832			export_Specimen_001_CD138 13-0035-2_074_DN.fcs	1.12	89.5	3.47	5.93
039-02-0005		0.68				039-02-0005	1.91													039-02-0014				1.43								039-02-0014		0.91							039-02-0013	3850.56	1.14		export_Specimen_001_CD138 13-0036-1_032_DN.fcs	3.61	56.1	5.35	34.9
039-02-0008		1.5				039-02-0008	2.65													039-02-0014				0.79								039-02-0008		1.5							039-02-0014	21800.6	0.85		export_Specimen_001_CD138 13-0036-2_044_DN.fcs	0.67	48	14.6	36.7
039-02-0010		0.94				039-02-0010	0.11													039-02-0017				0.97								039-13-0051		0.66							039-02-0014	69742.6	1.1		export_Specimen_001_CD138 13-0036-3_023_DN.fcs	0.69	72.8	7.33	19.2
039-02-0010		1.16				039-02-0010	0.4													039-02-0017				1.53								039-13-0061		0.78							039-02-0014	62579.4	1.39		export_Specimen_001_CD138 13-0038-1_029_DN.fcs	5.49	75.8	4.4	14.3
039-02-0010		0.072				039-02-0010	0.45													039-02-0017				0.9								039-13-0018		1.1							039-02-0014	140158	0.91		export_Specimen_001_CD138 13-0038-5_047_DN.fcs	3.07	75.7	5.11	16.1
039-02-0013		1.65				039-02-0013	0.86													039-02-0017				0.9								039-13-0012		1.3							039-02-0014	67908.9	1.29		export_Specimen_001_CD138 13-0039-3_029_DN.fcs	2.03	68.9	6.03	23.1
039-02-0013		1.14				039-02-0013	0.77													039-02-0022				0.49								039-13-0043		0.54							039-02-0017	1080.21	0.63		export_Specimen_001_CD138 13-0039-5_023_DN.fcs	4.16	60.8	6.41	28.7
039-02-0014		0.85				039-02-0014	1.43													039-02-0022				2.29								039-13-0026		1.08							039-02-0017	10548.5	0.47		export_Specimen_001_CD138 13-0040-1_065_DN.fcs	1.08	83.9	10.4	4.67
039-02-0014		1.1				039-02-0014	0.45													039-02-0022				1.3								039-13-0051		0.24							039-02-0017	23389.8	0.45		export_Specimen_001_CD138 13-0041-1_062_DN.fcs	1.8	73.6	6.99	17.6
039-02-0014		1.39				039-02-0014	0.78													039-13-0005				1.08								039-02-0022		1.64							039-02-0017	21486.8	0.6		export_Specimen_001_CD138 13-0041-2_026_DN.fcs	0.67	83.9	5.35	10
039-02-0014		0.91				039-02-0014	0.34													039-13-0005				0.69								039-13-0053		1.08							039-02-0022	76354.4	1.76		export_Specimen_001_CD138 13-0042-1_056_DN.fcs	0.3	62.4	24.7	12.6
039-02-0014		1.29				039-02-0014	0.47													039-13-0005				0.96								039-13-0012		0.56							039-02-0022	124762	1.46		export_Specimen_001_CD138 13-0043-1_071_DN.fcs	2.97	77.9	8.9	10.2
039-02-0017		0.63				039-02-0017	0.59													039-13-0005				0.75								039-13-0044		0.42							039-02-0022	75223.9	1.64		export_Specimen_001_CD138 13-0043-3_026_DN.fcs	2.53	81.3	6.9	9.26
039-02-0017		0.47				039-02-0017	0.8													039-13-0006				3.26								039-13-0029		0.93							039-02-0024	2007.57			export_Specimen_001_CD138 13-0043-4_026_DN.fcs	2.24	83.8	6.88	7.04
039-02-0017		0.45				039-02-0017	0.85													039-13-0006				0.73								039-13-0024		0.49							039-13-0005	193.35	1.39		export_Specimen_001_CD138 13-0044-2_071_DN.fcs	1.2	86.9	2.3	9.64
039-02-0017		0.6				039-02-0017	1.69													039-13-0011				0.64								039-13-0049		0.73							039-13-0005	557.67	1.29		export_Specimen_001_CD138 13-0044-4_050_DN.fcs	0.69	92.8	1.14	5.38
039-02-0022		1.76				039-02-0022	0.26													039-13-0012				0.03								039-13-0040		0.47							039-13-0005	638.83	1		export_Specimen_001_CD138 13-0044-5_020_DN.fcs	0.41	83.7	3.59	12.3
039-02-0022		1.46				039-02-0022	1.74													039-13-0012				0.5								039-13-0053		0.83							039-13-0005	618.08	1.82		export_Specimen_001_CD138 13-0045-2_062_DN.fcs	2.46	84.5	3.52	9.55
039-02-0022		1.64				039-02-0022	0.45													039-13-0012				1.39								039-13-0005		1.29							039-13-0006	24369.9	0.6		export_Specimen_001_CD138 13-0046-1_032_DN.fcs	3.15	75.8	3.05	18
039-13-0005		1.39				039-13-0005	0.72													039-13-0012				0.47								039-13-0038		0.5							039-13-0006	89508.9	1.46		export_Specimen_001_CD138 13-0046-2_032_DN.fcs	1.43	74.6	5.35	18.6
039-13-0005		1.29				039-13-0005	1.34													039-13-0014				4.79								039-02-0014		1.39							039-13-0011	31380.2	0.79		export_Specimen_001_CD138 13-0046-3_044_DN.fcs	1.7	82.9	4.11	11.3
039-13-0005		1				039-13-0005	0.39													039-13-0014				0.54								039-13-0014		0.58							039-13-0012	1233.17	0.81		export_Specimen_001_CD138 13-0046-4_028_DN.fcs	1.67	79.7	5.4	13.2
039-13-0005		1.82				039-13-0005	0.072													039-13-0014				0.4								039-13-0026		1.3							039-13-0012	26060.2	0.91		export_Specimen_001_CD138 13-0046-5_020_DN.fcs	1.47	83.2	4.05	11.2
039-13-0006		0.6				039-13-0006	1.03													039-13-0015				0.93								039-13-0053		0.84							039-13-0012	31065.2	0.56		export_Specimen_001_CD138 13-0047-1_038_DN.fcs	1.44	77.2	8.64	12.7
039-13-0006		1.46				039-13-0006	0.15													039-13-0015				0.77								039-13-0026		0.89							039-13-0012	27652.6	1.3		export_Specimen_001_CD138 13-0047-2_047_DN.fcs	2.74	73.1	6	18.2
039-13-0011		0.79				039-13-0011	0.41													039-13-0018				0.67								039-13-0024		0.9							039-13-0014	697.04	0.58		export_Specimen_001_CD138 13-0048-1_047_DN.fcs	2.4	70.4	6.97	20.3
039-13-0012		0.81				039-13-0012	0.53													039-13-0018				0.65								039-13-0044		0.36							039-13-0014	980.28	1.43		export_Specimen_001_CD138 13-0048-2_029_DN.fcs	4.5	68.3	4.23	23
039-13-0012		0.91				039-13-0012	0.53													039-13-0018				0.73								039-13-0005		1.82							039-13-0014	1273.41	0.79		export_Specimen_001_CD138 13-0048-3_041_DN.fcs	2.43	80.3	4.47	12.8
039-13-0012		0.56				039-13-0012	0.5													039-13-0023				1.01								039-02-0010		0.072							039-13-0015	7980.91	5.78		export_Specimen_001_CD138 13-0048-4_040_DN.fcs	0.9	79.3	8.45	11.4
039-13-0012		1.3				039-13-0012	3.09													039-13-0023				0.66								039-13-0018		1.53							039-13-0015	23551.5	0.54		export_Specimen_001_CD138 13-0049-1_041_DN.fcs	1.06	90	2.13	6.83
039-13-0014		0.58				039-13-0014	0.72													039-13-0023				0.84								039-02-0014		0.85							039-13-0015	20484.6			export_Specimen_001_CD138 13-0049-2_044_DN.fcs	1.11	82.4	4.29	12.2
039-13-0014		1.43				039-13-0014	0.44													039-13-0023				1.59								039-13-0018		0.97							039-13-0018	2259.87	0.97		export_Specimen_001_CD138 13-0049-4_042_DN.fcs	1.89	86.4	3.91	7.82
039-13-0014		0.79				039-13-0014	0.32													039-13-0024				0.98								039-13-0005		1							039-13-0018	5101.7	1.1		export_Specimen_001_CD138 13-0049-5_041_DN.fcs	0.93	86.4	4.64	8.04
039-13-0015		5.78				039-13-0015	1.28													039-13-0024				1.2								039-13-0005		1.39							039-13-0018	6946.85	1.53		export_Specimen_001_CD138 13-0050-2_041_DN.fcs	1.25	71.9	4.11	22.7
039-13-0015		0.54				039-13-0015	0.28													039-13-0025				0.55								039-13-0012		0.81							039-13-0023	945.04	0.91		export_Specimen_001_CD138 13-0050-3_029_DN.fcs	1.36	85.5	5.01	8.12
039-13-0018		0.97				039-13-0018	0.5													039-13-0025				1.92																	039-13-0023	1571.46	0.9		export_Specimen_001_CD138 13-0050-4_030_DN.fcs	1.57	74.8	5.52	18.1
039-13-0018		1.1				039-13-0018	1.25													039-13-0025				0.78								039-02-0015					5.68				039-13-0023	2809.36	1.05		export_Specimen_001_CD138 13-0050-5_023_DN.fcs	0.69	84.7	2.75	11.9
039-13-0018		1.53				039-13-0018	1.32													039-13-0026				1.16								039-02-0025							7.58		039-13-0023	4332.07	0.73		export_Specimen_001_CD138 13-0051-1_053_DN.fcs	2.03	87.9	3.27	6.81
039-13-0023		0.91				039-13-0023	0.43													039-13-0026					0.59							039-02-0019							1.27		039-13-0024	1288.27	0.9		export_Specimen_001_CD138 13-0051-3_035_DN.fcs	1.39	90.1	3.13	5.38
039-13-0023		0.9				039-13-0023	1.29													039-13-0026					0.68							039-02-0018					9.27				039-13-0024	1743.53	0.49		export_Specimen_001_CD138 13-0051-4_036_DN.fcs	0.89	82.5	10	6.64
039-13-0023		1.05				039-13-0023	1.25													039-13-0026					1.5							039-13-0036					6.04				039-13-0025	61130.8	2.03		export_Specimen_001_CD138 13-0051-5_023_DN.fcs	1.9	88.4	3.44	6.29
039-13-0023		0.73				039-13-0023	0.14													039-13-0029					0.85							039-02-0015					7.26				039-13-0025	30146.5	1.77		export_Specimen_001_CD138 13-0052-1_056_DN.fcs	3.59	52.2	5.49	38.7
039-13-0024		0.9				039-13-0024	0.15													039-13-0029					1.39							039-13-0032					0.16				039-13-0025	26100.6	2.29		export_Specimen_001_CD138 13-0052-3_020_DN.fcs	2.62	60.8	3.81	32.8
039-13-0024		0.49				039-13-0024	0.51													039-13-0029					0.91							039-13-0036					5.83				039-13-0026	895.97	1.3		export_Specimen_001_CD138 13-0052-4_032_DN.fcs	2.73	62.6	5.07	29.6
039-13-0025		2.03				039-13-0025	0.73													039-13-0029					1.29							039-13-0045					4.26				039-13-0026	1260.01	0.89		export_Specimen_001_CD138 13-0052-5_026_DN.fcs	2.24	46.9	5.27	45.6
039-13-0025		1.77				039-13-0025	0.19													039-13-0029					0.47							039-02-0025							8.46		039-13-0026	1863.03	1.3		export_Specimen_001_CD138 13-0053-1_059_DN.fcs	0.43	86.9	4.54	8.16
039-13-0025		2.29				039-13-0025	1.09													039-13-0030					0.45							039-13-0013					1.69				039-13-0026	2165.44	1.08		export_Specimen_001_CD138 13-0053-3_026_DN.fcs	1.04	90.5	2.28	6.21
039-13-0026		1.3				039-13-0026	0.27													039-13-0030					0.6							039-02-0021					3.37				039-13-0029	881.31	0.93		export_Specimen_001_CD138 13-0053-4_038_DN.fcs	1.01	85.8	4.35	8.89
039-13-0026		0.89				039-13-0026	1.41													039-13-0033					1.76							039-13-0013					1.37				039-13-0029	2084.74	0.69		export_Specimen_001_CD138 13-0053-5_029_DN.fcs	1.24	81.7	3.11	13.9
039-13-0026		1.3				039-13-0026	0.58													039-13-0034					1.46							039-13-0064					1.31				039-13-0029	5455.61	0.96		export_Specimen_001_CD138 13-0054-1_074_DN.fcs	1.42	60	5.44	33.1
039-13-0026		1.08				039-13-0026	1.22													039-13-0034					1.64							039-02-0019						3.03			039-13-0029	6755.81	0.75		export_Specimen_001_CD138 13-0054-4_023_DN.fcs	1.07	76.6	7.15	15.2
039-13-0029		0.93				039-13-0029	0.47													039-13-0038					0.6							039-02-0009				2.8					039-13-0029	6904.6	3.26		export_Specimen_001_CD138 13-0054-5_035_DN.fcs	1.69	88.1	2.18	7.99
039-13-0029		0.69				039-13-0029	0.28													039-13-0038					1.46							039-02-0025						5.21			039-13-0030	1405.55	0.73		export_Specimen_001_CD138 13-0055-1_077_DN.fcs	0.76	75.5	4.79	18.9
039-13-0029		0.96				039-13-0029	0.25													039-13-0040					0.79							039-02-0021				2.52					039-13-0030	1888.03	0.64		export_Specimen_001_CD138 13-0056-3_034_DN.fcs	2.05	76.9	10.3	10.8
039-13-0029		0.75				039-13-0029	0.41													039-13-0041					0.81							039-02-0009				2.96					039-13-0033	8338.78	0.44		export_Specimen_001_CD138 13-0056-4_032_DN.fcs	1.27	82.1	6.73	9.91
039-13-0029		3.26				039-13-0029	0.55													039-13-0042					1.3							039-02-0025						3.59			039-13-0034	6726.23	0.036		export_Specimen_001_CD138 13-0058-1_020_DN.fcs	2.08	77.4	4.39	16.2
039-13-0030		0.73				039-13-0030	0.22													039-13-0043					0.58							039-13-0027				2.57					039-13-0034	12094.8	0.03		export_Specimen_001_CD138 13-0058-2_026_DN.fcs	2.54	78.4	4.29	14.8
039-13-0030		0.64				039-13-0030	0.27													039-13-0043					5.78							039-13-0028						0.85			039-13-0038	483.12	0.5		export_Specimen_001_CD138 13-0058-3_023_DN.fcs	1.16	79.2	5.07	14.6
039-13-0033		0.44				039-13-0033	0.25													039-13-0043					0.54							039-13-0054				1.39					039-13-0038	6590.33	1.39		export_Specimen_001_CD138 13-0058-4_029_DN.fcs	1.04	87.7	3.39	7.92
039-13-0034		0.036				039-13-0034	0.87													039-13-0043					1.1							039-13-0003				0.53					039-13-0039	5606.43	0.47		export_Specimen_001_CD138 13-0058-5_026_DN.fcs	1.54	77	4.49	17
039-13-0034		0.03				039-13-0034	1.03													039-13-0044					0.91							039-13-0013				1.67					039-13-0040	2946.25	0.91		export_Specimen_001_CD138 13-0059-1_023_DN.fcs	1.96	74.1	11.3	12.6
039-13-0038		0.5				039-13-0038	0.34													039-13-0044					1.05							039-13-0054				3.21					039-13-0041	1207.21	4.79		export_Specimen_001_CD138 13-0059-2_028_DN.fcs	0.87	64.4	27.2	7.53
039-13-0038		1.39				039-13-0038	1.17													039-13-0044					0.73							039-02-0016				5.78					039-13-0042	604.87	0.54		export_Specimen_001_CD138 13-0059-3_035_DN.fcs	1.26	74.2	14.1	10.5
039-13-0040		0.47				039-13-0040	1.7													039-13-0047					2.03							039-13-0003				0.6					039-13-0043	1276.61	0.26		export_Specimen_001_CD138 13-0059-4_041_DN.fcs	1.02	69	19.8	10.2
039-13-0041		0.91				039-13-0041	0.58													039-13-0047					1.77							039-13-0039				1.75					039-13-0043	2340.71	0.43		export_Specimen_001_CD138 13-0060-1_035_DN.fcs	1.18	89.1	3.28	6.42
039-13-0042		4.79				039-13-0042	0.44													039-13-0048					1.3							039-13-0060				0.48					039-13-0043	4591.71	0.4		export_Specimen_001_CD138 13-0060-2_034_DN.fcs	0.58	85.7	7.39	6.33
039-13-0043		0.54				039-13-0043	0.16													039-13-0048					0.89							039-13-0032				0.37					039-13-0043	23774.5	0.74		export_Specimen_001_CD138 13-0060-3_029_DN.fcs	0.79	87.6	4.28	7.29
039-13-0043		0.26				039-13-0043	0.25													039-13-0048					0.93							039-13-0046				1.28					039-13-0044	28324.2	0.36		export_Specimen_001_CD138 13-0060-4_038_DN.fcs	1.99	89.6	2.43	5.97
039-13-0043		0.43				039-13-0043	1.03													039-13-0048					0.44							039-02-0018				0.87					039-13-0044	20347.8	0.42		export_Specimen_001_CD138 13-0060-5_029_DN.fcs	1.6	84.4	5.86	8.12
039-13-0043		0.4				039-13-0043	0.27													039-13-0049					0.036							039-13-0039				1.82					039-13-0046	77105.5	1.92		export_Specimen_001_CD138 13-0061-1_032_DN.fcs	2.89	76.5	2.73	17.9
039-13-0044		0.74				039-13-0044	0.64													039-13-0049					0.91							039-13-0028						1.18			039-13-0047	137080	1.42		export_Specimen_001_CD138 13-0061-3_026_DN.fcs	2.98	58.3	10.3	28.4
039-13-0044		0.36				039-13-0044	0.17													039-13-0049					0.26							039-13-0052						4.11			039-13-0047	49974.2	0.93		export_Specimen_001_CD138 13-0061-4_035_DN.fcs	1.75	71.6	7.72	18.9
039-13-0044		0.42				039-13-0044	2.27													039-13-0049					0.43							039-13-0004				0.76					039-13-0048	66933.1	0.93		export_Specimen_001_CD138 13-0061-5_032_DN.fcs	1.21	77.3	6.93	14.5
039-13-0047		1.92				039-13-0047	1.87													039-13-0050					0.74							039-13-0046				0.97					039-13-0048	45929.6	0.77		export_Specimen_001_CD138 13-0064-1_050_DN.fcs	1.08	78.8	7.31	12.8
039-13-0047		1.42				039-13-0047	1.82													039-13-0050					0.36							039-13-0009				0.53					039-13-0048	40512.8	0.67		export_Specimen_001_CD138 13-0064-3_020_DN.fcs	2.05	74.9	3.14	19.9
039-13-0048		0.93				039-13-0048	0.27													039-13-0050					0.42							039-13-0028						1.17			039-13-0048	462.21	0.75		export_Specimen_001_CD138 13-0064-4_032_DN.fcs	1.29	72.2	6.11	20.4
039-13-0048		0.93				039-13-0048	0.55													039-13-0050					1.42							039-13-0064				2.42					039-13-0049	5230.75	0.65		export_Specimen_001_CD138 13-0064-5_020_DN.fcs	0	71.6	4.55	23.8
039-13-0048		0.77				039-13-0048	0.45													039-13-0051					0.45							039-13-0031				2.06					039-13-0049	6601.62	0.45		export_Specimen_001_CD138 13-0069-3_038_DN.fcs	2.74	65.7	12.3	19.2
039-13-0048		0.67				039-13-0048	0.03													039-13-0051					0.82							039-13-0010				0.21					039-13-0049	6041.47	0.73		export_Specimen_001_CD138 13-0069-4_026_DN.fcs	0.66	62.1	15.3	22
039-13-0049		0.75				039-13-0049	0.7													039-13-0051					0.62							039-13-0054				1.08					039-13-0049	31293	0.82
039-13-0049		0.65				039-13-0049	0.24													039-13-0051					1.66							039-13-0009				2.4					039-13-0050	28412.3	0.62
039-13-0049		0.45				039-13-0049	0.35													039-13-0053					0.88							039-13-0009				0.56					039-13-0050	30958.5	1.66
039-13-0049		0.73				039-13-0049	0.41													039-13-0053					0.94							039-13-0028						1.4			039-13-0050	35536	1.01
039-13-0050		0.82				039-13-0050	0.52													039-13-0053					0.24							039-13-0064				1.45					039-13-0050	21619	0.88
039-13-0050		0.62				039-13-0050	0.56													039-13-0053					0.83							039-13-0064				2					039-13-0051	63473.1	0.66
039-13-0050		1.66				039-13-0050	0.65													039-13-0055					1.08							039-02-0011				1.71					039-13-0051	52546.6	0.94
039-13-0050		1.01				039-13-0050	0.58													039-13-0056					1.13							039-13-0028						1.09			039-13-0051	35542.5	0.24
039-13-0051		0.88				039-13-0051	0.51													039-13-0056					1.19							039-13-0035				1.28					039-13-0052	1789.3	0.83
039-13-0051		0.66				039-13-0051	0.062													039-13-0058					0.91							039-13-0004				0.83					039-13-0053	1684.65	0.84
039-13-0051		0.94				039-13-0051	1.17													039-13-0058					0.31							039-13-0027				2.28					039-13-0053	1809.12	1.08
039-13-0051		0.24				039-13-0051	1.2													039-13-0058					1.27							039-13-0046				1.35					039-13-0053	1063.95	1.13
039-13-0053		0.83				039-13-0053	0.12													039-13-0058					1.47							039-13-0032				0.37					039-13-0054	1460.56	1.19
039-13-0053		0.84				039-13-0053	1.11													039-13-0058					1.16							039-13-0035				0.95					039-13-0055	100498	0.91
039-13-0053		1.08				039-13-0053	0.37													039-13-0059					0.49							039-13-0031				1.12					039-13-0056	86310.3	0.31
039-13-0053		1.13				039-13-0053	0.99													039-13-0059					1.24							039-13-0046				0.59					039-13-0056	25933.1	1.27
039-13-0055		1.19				039-13-0055	1.04													039-13-0059					1.19							039-13-0069				2					039-13-0058	27396.2	1.47
039-13-0056		0.91				039-13-0056	0.27													039-13-0059						1.65						039-13-0060				0.55					039-13-0058	22018	1.16
039-13-0056		0.31				039-13-0056	0.24													039-13-0061						0.63						039-13-0046				0.87					039-13-0058	20318.5	0.49
039-13-0058		1.27				039-13-0058	0.39													039-13-0061						1.92						039-13-0010				0.7					039-13-0058	16235.3	1.59
039-13-0058		1.47				039-13-0058	0.38													039-13-0061						0.93						039-13-0031				1.01					039-13-0058	23793.7	1.24
039-13-0058		1.16				039-13-0058	0.57													039-13-0061						0.75						039-13-0036				2.63					039-13-0059	18346.3	0.98
039-13-0058		0.49				039-13-0058	0.83													02-1003										0.82		039-13-0069				1.69					039-13-0059	20840.4	1.2
039-13-0058		1.59				039-13-0058	1.38													02-2001										1.33		039-13-0060				0.5					039-13-0059	20388.4	0.55
039-13-0059		1.24				039-13-0059	1.46													02-2003										0.89		039-13-0031				1.41					039-13-0060	19933	1.19
039-13-0059		0.98				039-13-0059	0.92													02-2004										0.76		039-13-0060				0.39					039-13-0061	63521.1	1.92
039-13-0059		1.2				039-13-0059	1.38													02-2009										1.72		039-13-0060				0.8					039-13-0061	56242	0.78
039-13-0059		0.55				039-13-0059	0.75													02-2010										9.14		039-13-0027				2.92					039-13-0061	38197.7	1.16
039-13-0061		1.19				039-13-0061	0.4													02-2011										1.1		039-13-0052						2.8
039-13-0061		1.92				039-13-0061	0.19													02-2012										1.03		039-13-0069				3.21
039-13-0061		0.78				039-13-0061	0.63													02-2013										0.52		039-02-0016				6.76
039-13-0061		1.16				039-13-0061	0.61													11-2006										0.64		039-13-0069				3.51
																																039-13-0052						4.79
																																039-13-0052						3.51

## Sheet: Figure 5 raw data
% CD5+ PDL1+ of CD19+						% CD5+ PDL1+ of CD19+ longitudinal								% CD5+ PDL1+ of CD19+ vs disease severity (Ordinal scale)												% TFH of CD4+ longitudinal								Figure supplement 1								Figure supplement 1
PID	HIV-	HIV+	HIV+Viremic	Control		HIV- PIDs	0-6	7-13	14-20	21-27	28-34	35+		PID	1	2	3	1	2	3	1	2	3	Control		HIV- PIDs	0-6	7-13	14-20	21-27	28-34	35+		% CD5+ PDL1+ of CD19+ longitudinal								% TFH of CD4+ longitudinal
039-13-0052			20.2			039-02-0005	1.11			2.61				039-02-0009	15.5	0.61										039-02-0005								HIV- PIDs	0-6	7-13	14-20	21-27	28-34	35+		HIV- PIDs	0-6	7-13	14-20	21-27	28-34	35+
039-13-0052			14.9			039-02-0006								039-02-0011	12.5											039-02-0006								039-02-0005	1.11			2.61				039-02-0005
039-13-0052			9.28			039-02-0008						12.5		039-02-0015			3.04									039-02-0008						2.28		039-02-0006								039-02-0006
039-13-0028			26.4			039-02-0010				2.35	2.57	6.84		039-02-0016		4.28										039-02-0010				1.37	0.55			039-02-0008						12.5		039-02-0008						2.28
039-02-0025			0.96			039-02-0013		1.29				20.3		039-02-0018		1.43										039-02-0013		2.23				0.39		039-02-0010				2.35	2.57	6.84		039-02-0010				1.37	0.55
039-13-0028			8.07			039-02-0014		4.28	3.37	17.7	22.9	17.9		039-02-0019								5.17				039-02-0014		0.21	1.5	1.49		1.47		039-02-0013		1.29				20.3		039-02-0013		2.23				0.39
039-13-0028			4.38			039-02-0017	0	3.86		4.6	6.24			039-02-0021	28.7	3.4										039-02-0017	1.91			0.83	0.15			039-02-0014		4.28	3.37	17.7	22.9	17.9		039-02-0014		0.21	1.5	1.49		1.47
039-13-0028			28.7			039-02-0020								039-02-0025								9.43	0.96			039-02-0020								039-02-0017	0	3.86		4.6	6.24			039-02-0017	1.91			0.83	0.15
039-02-0004			11.6			039-02-0022		1.74			13.8	11.7		039-13-0003		1.74										039-02-0022		0.39				0.72		039-02-0020								039-02-0020
039-13-0028			7.82			039-02-0023								039-13-0004							0.77					039-02-0023								039-02-0022		1.74			13.8	11.7		039-02-0022		0.39				0.72
039-02-0019			3.4			039-02-0024								039-13-0009	2.21	4.6										039-02-0024								039-02-0023								039-02-0023
039-02-0019			7.02			039-13-0001								039-13-0010	2.35											039-13-0001								039-02-0024								039-02-0024
039-02-0009		12.3				039-13-0002								039-13-0013	0.51	7.02										039-13-0002								039-13-0001								039-13-0001
039-02-0009		5.78				039-13-0005						3.54		039-13-0027	5.49	1.3										039-13-0005								039-13-0002								039-13-0002
039-02-0011		0.59				039-13-0006			1.97			11.4		039-13-0028							21.2					039-13-0006			1.06			1.15		039-13-0005						3.54		039-13-0005
039-02-0015		3.04				039-13-0007								039-13-0031	2.43	1.9										039-13-0007								039-13-0006			1.97			11.4		039-13-0006			1.06			1.15
039-02-0015		0.43				039-13-0008								039-13-0032	2.63	0.8										039-13-0008								039-13-0007								039-13-0007
039-02-0016		1.43				039-13-0011		0.14						039-13-0035		2.55										039-13-0011								039-13-0008								039-13-0008
039-02-0016		7.47				039-13-0012	0.64		5.86	4.77	8.25			039-13-0036		2.65										039-13-0012			0.3	0.79	1.13			039-13-0011		0.14						039-13-0011
039-02-0018		5.17				039-13-0014	0.57	3.5	0.43					039-13-0039	5.91	13.8										039-13-0014		1.38	0.7					039-13-0012	0.64		5.86	4.77	8.25			039-13-0012			0.3	0.79	1.13
039-02-0018		1.44				039-13-0015			0.1	2.35				039-13-0045												039-13-0015			0.46	1.03				039-13-0014	0.57	3.5	0.43					039-13-0014		1.38	0.7
039-02-0021		0.54				039-13-0018		1.14	2.56	13.6				039-13-0046	13.6		7.19									039-13-0018		0.46	0.48	0.88				039-13-0015			0.1	2.35				039-13-0015			0.46	1.03
039-02-0021		2.03				039-13-0020								039-13-0052							4.23	3.74				039-13-0020								039-13-0018		1.14	2.56	13.6				039-13-0018		0.46	0.48	0.88
039-02-0025		3.11				039-13-0021								039-13-0054	20.3		4.73									039-13-0021								039-13-0020								039-13-0020
039-02-0025		4.09				039-13-0023	1.3	1.21	7.07	6.99				039-13-0060	26.4	6.33										039-13-0023		0.54	1.48	0.96				039-13-0021								039-13-0021
039-02-0025		9.63				039-13-0024	1.61	0.85						039-13-0064		0.72	0.31									039-13-0024		0.65						039-13-0023	1.3	1.21	7.07	6.99				039-13-0023		0.54	1.48	0.96
039-13-0003		0.11				039-13-0025			1.15		2.8	14.6		039-13-0069		14.9										039-13-0025			1.43		0.35	0.94		039-13-0024	1.61	0.85						039-13-0024		0.65
039-13-0004		0.51				039-13-0026		1.01		13.8	9	8.91		039-02-0005					11.6							039-13-0026		0.33		0.77		0.81		039-13-0025			1.15		2.8	14.6		039-13-0025			1.43		0.35	0.94
039-13-0009		3.71				039-13-0029	0.8	0.071	2.43	0.75	0			039-02-0008					3.75							039-13-0029	0.42	0.88	0.69		0.44			039-13-0026		1.01		13.8	9	8.91		039-13-0026		0.33		0.77		0.81
039-13-0009		3.24				039-13-0030	0.77	0.033						039-02-0010				6.36								039-13-0030		0.91						039-13-0029	0.8	0.071	2.43	0.75	0			039-13-0029	0.42	0.88	0.69		0.44
039-13-0009		5.68				039-13-0033						20.9		039-02-0013				3.54		1.29						039-13-0033						0.05		039-13-0030	0.77	0.033						039-13-0030		0.91
039-13-0009		7.33				039-13-0034		2.65	5.49					039-02-0014				1.61	1.11							039-13-0034		0.8	0.91					039-13-0033						20.9		039-13-0033						0.05
039-13-0010		0.55				039-13-0038		10.5				23.3		039-02-0017					12.3	0						039-13-0038		1.84						039-13-0034		2.65	5.49					039-13-0034		0.8	0.91
039-13-0010		8.76				039-13-0040		9.1						039-02-0022					0.54							039-13-0040		1.75						039-13-0038		10.5				23.3		039-13-0038		1.84
039-13-0013		0.057				039-13-0041	2.62							039-13-0005				21.5								039-13-0041	2.69							039-13-0040		9.1						039-13-0040		1.75
039-13-0013		0.68				039-13-0042		1.54						039-13-0006					17.7							039-13-0042		16.12						039-13-0041	2.62							039-13-0041	2.69
039-13-0013		0.53				039-13-0043	2.21	4.66	10.4	1.08				039-13-0011					3.71							039-13-0043	1.48		0.87	0.52				039-13-0042		1.54						039-13-0042		16,12*
039-13-0017		2.61				039-13-0044		19.6		16.9	15.5			039-13-0012				2.03	0.14							039-13-0044					0.57			039-13-0043	2.21	4.66	10.4	1.08				039-13-0043	1.48		0.87	0.52
039-13-0027		1.9				039-13-0047			0.12	7.58				039-13-0014				0.057	0.64							039-13-0047				0.87				039-13-0044		19.6		16.9	15.5			039-13-0044					0.57
039-13-0027		1.98				039-13-0048	1.73	18.4	3.9	7.31				039-13-0015					3.86							039-13-0048	2.5	1.65	1.84	0.79				039-13-0047			0.12	7.58				039-13-0047				0.87
039-13-0027		1.64				039-13-0049			0.75	19.5		7.7		039-13-0018				1.14	1.97							039-13-0049			1.28	1.29		0.77		039-13-0048	1.73	18.4	3.9	7.31				039-13-0048	2.5	1.65	1.84	0.79
039-13-0031		1.32				039-13-0050		5.29		0.72	5.34	7.42		039-13-0023				0.85	0.57							039-13-0050		0.73			0.64	0.32		039-13-0049			0.75	19.5		7.7		039-13-0049			1.28	1.29		0.77
039-13-0031		0.15				039-13-0051		0		0.49	2.2	6.36		039-13-0024				1.98								039-13-0051					1.05	0.54		039-13-0050		5.29		0.72	5.34	7.42		039-13-0050		0.73			0.64	0.32
039-13-0031		5.72				039-13-0053			0		4.7	3.75		039-13-0025				0.071	0.11							039-13-0053						0.37		039-13-0051		0		0.49	2.2	6.36		039-13-0051					1.05	0.54
039-13-0031		0.33				039-13-0055	10.7							039-13-0026				0.033	2.61							039-13-0055	0.3							039-13-0053			0		4.7	3.75		039-13-0053						0.37
039-13-0032		2.55				039-13-0056			8.91	12.1				039-13-0029				2.57	1.01							039-13-0056			1.01	1.06				039-13-0055	10.7							039-13-0055	0.3
039-13-0032		0.13				039-13-0057								039-13-0030				0.43								039-13-0057								039-13-0056			8.91	12.1				039-13-0056			1.01	1.06
039-13-0032		3.67				039-13-0058		6.33	0	11.6	10.8	16.7		039-13-0033					4.09							039-13-0058		0.57		0.98	0.84	0.21		039-13-0057								039-13-0057
039-13-0035		5.4				039-13-0059		2.97	2.05	2	3.12			039-13-0034				0.49	1.32							039-13-0059		0.24		0.31	0.26			039-13-0058		6.33	0	11.6	10.8	16.7		039-13-0058		0.57		0.98	0.84	0.21
039-13-0035		13.5				039-13-0061	0.11		2.04	1.49	4.18			039-13-0038				4.7								039-13-0061	0.77		0.25	0.24	0.34			039-13-0059		2.97	2.05	2	3.12			039-13-0059		0.24		0.31	0.26
039-13-0036		1.07				HIV+ PIDs	0-6	7-13	14-20	21-27	28-34	35+		039-13-0040				2.04								HIV+ PIDs	0-6	7-13	14-20	21-27	28-34	35+		039-13-0061	0.11		2.04	1.49	4.18			039-13-0061	0.77		0.25	0.24	0.34
039-13-0036		0.22				039-02-0009		12.3	5.78					039-13-0041					5.4							039-02-0009		1.99	1.64					HIV+ PIDs	0-6	7-13	14-20	21-27	28-34	35+		HIV+ PIDs	0-6	7-13	14-20	21-27	28-34	35+
039-13-0036		3.74				039-02-0011			0.59					039-13-0042				6.84								039-02-0011			2.05					039-02-0009		12.3	5.78					039-02-0009		1.99	1.64
039-13-0037		21.5				039-02-0012								039-13-0043				8.38	13.5							039-02-0012								039-02-0011			0.59					039-02-0011			2.05
039-13-0039		2.62				039-02-0015	3.04	0.43						039-13-0044					0.22							039-02-0015	1.36	2.45						039-02-0012								039-02-0012
039-13-0039		11				039-02-0016		1.43	7.47					039-13-0047					4.66	0.12						039-02-0016		1.37	2.35					039-02-0015	3.04	0.43						039-02-0015	1.36	2.45
039-13-0046		7.19				039-02-0018		5.17			1.44			039-13-0048				0.33		1.73						039-02-0018		1.69						039-02-0016		1.43	7.47					039-02-0016		1.37	2.35
039-13-0046		21.2				039-02-0019					3.4	7.02		039-13-0049				16.5	2.7	0.75						039-02-0019					1.89			039-02-0018		5.17			1.44			039-02-0018		1.69
039-13-0046		2.63				039-02-0021		0.54	2.03					039-13-0050				4.88	19.6							039-02-0021		3.63	1.04					039-02-0019					3.4	7.02		039-02-0019					1.89
039-13-0046		16.5				039-02-0025	0.96		3.11	4.09	9.63			039-13-0051				3.12	1.07							039-02-0025	0.85		0.93	0.78				039-02-0021		0.54	2.03					039-02-0021		3.63	1.04
039-13-0046		20.1				039-02-0026								039-13-0053				1.49	2.62							039-02-0026								039-02-0025	0.96		3.11	4.09	9.63			039-02-0025	0.85		0.93	0.78
039-13-0054		4.73				039-13-0003	0	0.11						039-13-0055					0							039-13-0003								039-02-0026								039-02-0026
039-13-0054		4.88				039-13-0004	0	0.51						039-13-0056					2.62							039-13-0004								039-13-0003	0	0.11						039-13-0003
039-13-0054		8.91				039-13-0009		3.71			5.68	7.33		039-13-0058				7.33	0							039-13-0009					0.75	1.06		039-13-0004	0	0.51						039-13-0004
039-13-0060		0.61				039-13-0010			0.55		8.76			039-13-0059				8.76	10.7							039-13-0010			1.79		1.34			039-13-0009		3.71			5.68	7.33		039-13-0009					0.75	1.06
039-13-0060		5.91				039-13-0013		0.057	0.68		0.53			039-13-0061				11	2.97							039-13-0013		5.69	2.43		3.85			039-13-0010			0.55		8.76			039-13-0010			1.79		1.34
039-13-0060		4.23				039-13-0016								02-1003										0.36		039-13-0016								039-13-0013		0.057	0.68		0.53			039-13-0013		5.69	2.43		3.85
039-13-0060		12				039-13-0017								02-2001										1.08		039-13-0017								039-13-0016								039-13-0016
039-13-0064		0.31				039-13-0019								02-2003										13.9		039-13-0019								039-13-0017								039-13-0017
039-13-0064		1.3				039-13-0022								02-2004										15.7		039-13-0022								039-13-0019								039-13-0019
039-13-0064		1.85				039-13-0027		1.9	1.98	1.64				02-2009										10.8		039-13-0027		0.54	0.46	0.73				039-13-0022								039-13-0022
039-13-0064		1.44				039-13-0028	28.7	7.82	4.38	8.07	26.4			02-2010										2.51		039-13-0028	1.34	1.21	2.75	0.54				039-13-0027		1.9	1.98	1.64				039-13-0027		0.54	0.46	0.73
039-13-0069		9.43				039-13-0031		1.32	0.15	5.72	0.33			02-2011										16.4		039-13-0031		1.14	0.69	2.28	0.91			039-13-0028	28.7	7.82	4.38	8.07	26.4			039-13-0028	1.34	1.21	2.75	0.54
039-13-0069		12.4				039-13-0032		2.55	0.13		3.67			02-2012										32.6		039-13-0032		2.55	1.8		2.51			039-13-0031		1.32	0.15	5.72	0.33			039-13-0031		1.14	0.69	2.28	0.91
039-13-0069		12.4				039-13-0035		5.4	13.5					02-2013										15		039-13-0035		0.99	1.96					039-13-0032		2.55	0.13		3.67			039-13-0032		2.55	1.8		2.51
039-13-0069		12.5				039-13-0036		1.07	0.22	3.74				11-2006										36.6		039-13-0036		0.75	1.69					039-13-0035		5.4	13.5					039-13-0035		0.99	1.96
039-02-0005	1.11					039-13-0037																				039-13-0037								039-13-0036		1.07	0.22	3.74				039-13-0036		0.75	1.69
039-02-0005	2.61					039-13-0039				2.62		11														039-13-0039								039-13-0037								039-13-0037
039-02-0008	12.5					039-13-0045			0																	039-13-0045			1.92					039-13-0039				2.62		11		039-13-0039
039-02-0010	2.35					039-13-0046	7.19	21.2	2.63	16.5	20.1															039-13-0046	1.06	0.83	1.57	0.67	0.36			039-13-0045			0					039-13-0045			1.92
039-02-0010	2.57					039-13-0052		0		14.9	9.28	20.2														039-13-0052					3.58	2.85		039-13-0046	7.19	21.2	2.63	16.5	20.1			039-13-0046	1.06	0.83	1.57	0.67	0.36
039-02-0010	6.84					039-13-0054		4.73			4.88	8.91														039-13-0054					0.5	0.68		039-13-0052		0		14.9	9.28	20.2		039-13-0052					3.58	2.85
039-02-0013	1.29					039-13-0060			0.61	0	5.91	4.23														039-13-0060			0.28		0.45	0.4		039-13-0054		4.73			4.88	8.91		039-13-0054					0.5	0.68
039-02-0013	20.3					039-13-0063																				039-13-0063								039-13-0060			0.61	0	5.91	4.23		039-13-0060			0.28		0.45	0.4
039-02-0014	4.28					039-13-0064			0.31		1.3	1.85														039-13-0064			0.68		0.51	0.97		039-13-0063								039-13-0063
039-02-0014	3.37					039-13-0068																				039-13-0068								039-13-0064			0.31		1.3	1.85		039-13-0064			0.68		0.51	0.97
039-02-0014	17.7					039-13-0069			9.43	12.4	12.4	12.5														039-13-0069			0.24	0.25		0.83		039-13-0068								039-13-0068
039-02-0014	22.9																																	039-13-0069			9.43	12.4	12.4	12.5		039-13-0069			0.24	0.25		0.83
039-02-0014	17.9
039-02-0017	3.86
039-02-0017	4.6
039-02-0017	6.24
039-02-0022	1.74
039-02-0022	13.8
039-02-0022	11.7
039-13-0005	3.54
039-13-0005	0.51
039-13-0005	8.38
039-13-0005	2.5
039-13-0006	1.97
039-13-0006	11.4
039-13-0011	0.14
039-13-0012	0.64
039-13-0012	5.86
039-13-0012	4.77
039-13-0012	8.25
039-13-0014	0.57
039-13-0014	3.5
039-13-0014	0.43
039-13-0015	0.1
039-13-0015	2.35
039-13-0015	2.7
039-13-0018	1.14
039-13-0018	2.56
039-13-0018	13.6
039-13-0023	1.3
039-13-0023	1.21
039-13-0023	7.07
039-13-0023	6.99
039-13-0024	1.61
039-13-0024	0.85
039-13-0025	1.15
039-13-0025	2.8
039-13-0025	14.6
039-13-0026	1.01
039-13-0026	13.8
039-13-0026	9
039-13-0026	8.91
039-13-0029	0.8
039-13-0029	0.071
039-13-0029	2.43
039-13-0029	0.75
039-13-0030	0.77
039-13-0030	0.033
039-13-0033	20.9
039-13-0034	2.65
039-13-0034	5.49
039-13-0038	10.5
039-13-0038	23.3
039-13-0040	9.1
039-13-0041	2.62
039-13-0042	1.54
039-13-0043	2.21
039-13-0043	4.66
039-13-0043	10.4
039-13-0043	1.08
039-13-0044	19.6
039-13-0044	16.9
039-13-0044	15.5
039-13-0047	0.12
039-13-0047	7.58
039-13-0048	1.73
039-13-0048	18.4
039-13-0048	3.9
039-13-0048	7.31
039-13-0049	0.75
039-13-0049	19.5
039-13-0049	7.7
039-13-0049	10.8
039-13-0050	5.29
039-13-0050	0.72
039-13-0050	5.34
039-13-0050	7.42
039-13-0051	0
039-13-0051	0.49
039-13-0051	2.2
039-13-0051	6.36
039-13-0053	0
039-13-0053	4.7
039-13-0053	3.75
039-13-0053	9.47
039-13-0055	10.7
039-13-0056	8.91
039-13-0056	12.1
039-13-0058	6.33
039-13-0058	11.6
039-13-0058	10.8
039-13-0058	16.7
039-13-0059	2.97
039-13-0059	2.05
039-13-0059	2
039-13-0059	3.12
039-13-0061	0.11
039-13-0061	2.04
039-13-0061	1.49
039-13-0061	4.18
039-13-0065	14.2
02-1003				0.36
02-2001				1.08
02-2003				13.9
02-2004				15.7
02-2009				10.8
02-2010				2.51
02-2011				16.4
02-2012				32.6
02-2013				15
11-2006				36.6

## Sheet: Figure 6 raw data
% BAIT+ of Memory							% IgM+ Memory of BAIT+						% CSM of BAIT+						% CXCR3+ of BAIT+						% DN2 of BAIT+ (DN)
	HIV-		HIV+					HIV-		HIV+				HIV-		HIV+				HIV-		HIV+				HIV-		HIV+
PID	0	84	0	84	Control		PID	0	84	0	84		PID	0	84	0	84		PID	0	84	0	84		PID	0	84	0	84
039-02-0014	0.48	0.91					039-02-0014	34.7	0				039-02-0014	59.2	100				039-02-0014	85.7	35.7				039-02-0014	50	0
039-13-0012	0.13	0.84					039-13-0012	25	11.4				039-13-0012	50	83.5				039-13-0012	75	59.5				039-13-0012		16.7
039-13-0014	0.11	0.36					039-13-0014	25	22.4				039-13-0014	25	75.5				039-13-0014	25	87.8				039-13-0014		0
039-13-0023	0.26	0.13					039-13-0023	9.52	28.6				039-13-0023	81	71.4				039-13-0023	52.4	85.7				039-13-0023		0
039-13-0026	0.12						039-13-0026	53.8					039-13-0026	46.2					039-13-0026	46.2					039-13-0026	20	0
039-13-0029	0.16	0.2					039-13-0029	16.7	7.41				039-13-0029	77.8	81.5				039-13-0029	66.7	18.5				039-13-0029	25	0
039-13-0038	0.052	0.48					039-13-0038	50	6.35				039-13-0038	50	90.5				039-13-0038	83.3	12.7				039-13-0038		0
039-13-0048	0.2	0.32					039-13-0048	23.7	20				039-13-0048	60.5	74				039-13-0048	63.2	58				039-13-0048	33.3	0
039-13-0053	0.058	0.043					039-13-0053	41.7	25				039-13-0053	58.3	75				039-13-0053	50	50				039-13-0053	50	20
039-13-0061	0.93	0.57					039-13-0061	9.94	5.8				039-13-0061	85.7	92				039-13-0061	83.2	81.9				039-13-0061	33.3	33.3
039-02-1003					0.045		039-02-0016			23.2	8.97		039-02-0016			67.9	84.1		039-02-0016			86	77.2		039-02-0016			45.8	7.69
039-02-2009					0		039-02-0018			33.3	28.6		039-02-0018			33.3	71.4		039-02-0018			100	71.4		039-02-0018				33.3
039-02-0016			1.65	0.88			039-02-0025			16.7			039-02-0025			76.2			039-02-0025			50			039-02-0025			75	0
039-02-0018			0.21	0.34			039-13-0009			0	37.5		039-13-0009			100	55		039-13-0009			83.3	92.5		039-13-0009				0
039-02-0025			0.4				039-13-0027			10.3	37.8		039-13-0027			82.8	56.8		039-13-0027			82.8	93.2		039-13-0027			60	44.4
039-13-0009			0.081	0.31			039-13-0028			33.3			039-13-0028			22.2			039-13-0028			77.8			039-13-0028				0
039-13-0027			0.52	1.16			039-13-0035			36.4	0		039-13-0035			54.5	100		039-13-0035			63.6	100		039-13-0035			100	0
039-13-0028			0.12	0.012			039-13-0036			36.7	17.6		039-13-0036			51.3	82.4		039-13-0036			85.4	60.8		039-13-0036			68.8	33.3
039-13-0035			0.33	0.49			039-13-0054			20	33.3		039-13-0054			80	66.7		039-13-0054			60	66.7		039-13-0054			33.3	0
039-13-0036			0.87	0.2			039-13-0060			60			039-13-0060			40			039-13-0060			60			039-13-0060				0
039-13-0054			0.14	0.75
039-13-0060			0.15
039-02-2001					0.022
039-02-2003					0.16
