# Supplementary figures and images for: HIV skews the SARS-CoV-2 B cell response towards an extrafollicular maturation pathway
Source: eLife journal article supplement (doi:10.7554/elife.79924), 2022-10-27

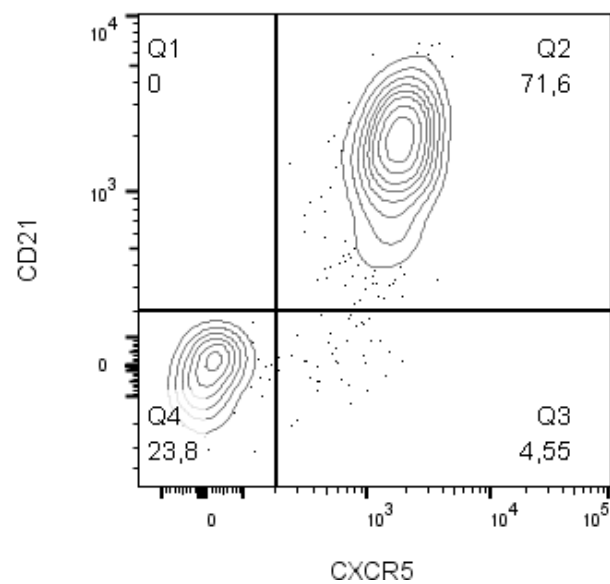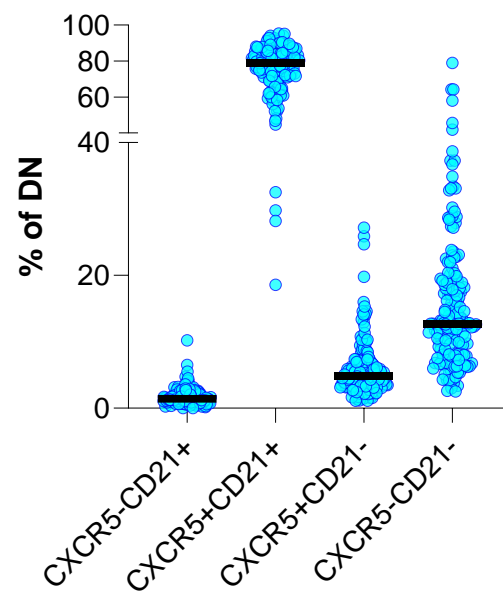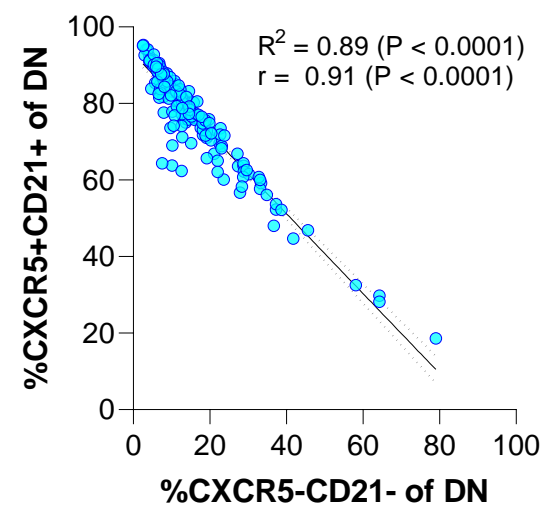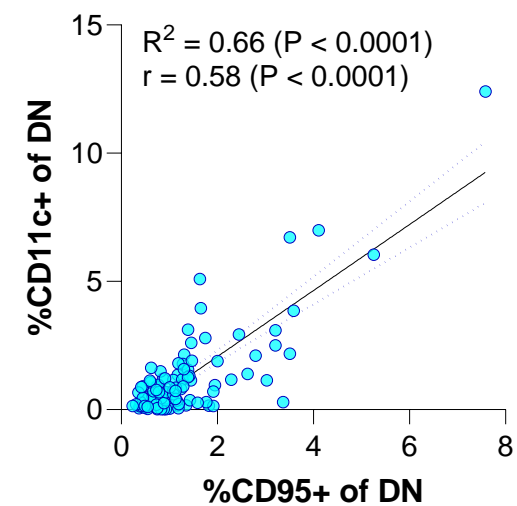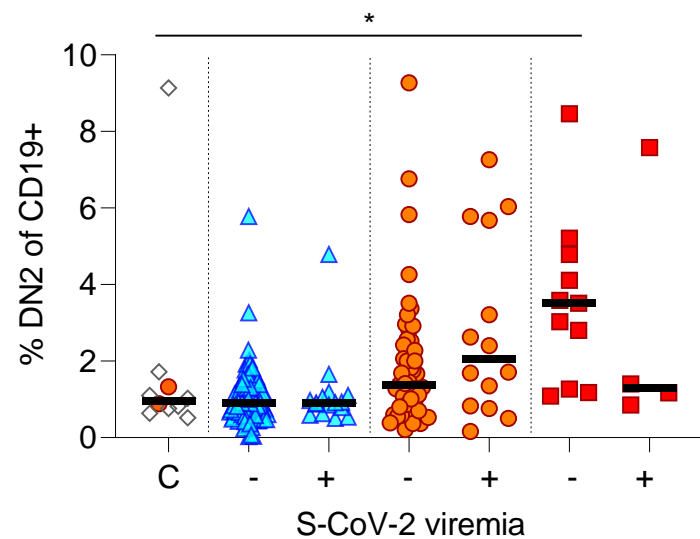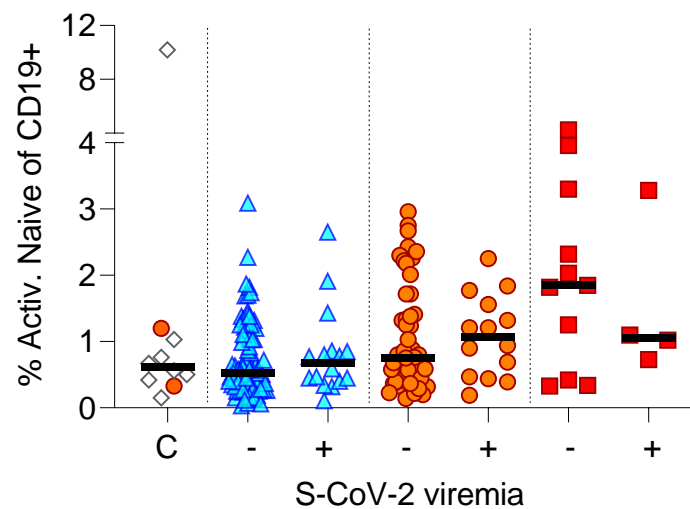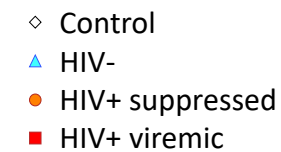

Supplement: supp [file elife-79924-supp-v1.zip]

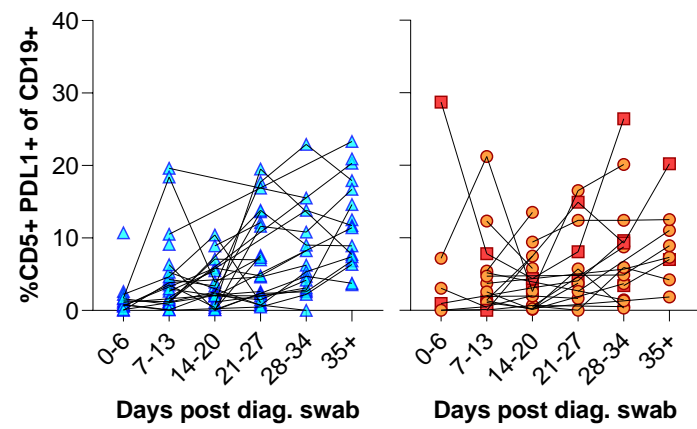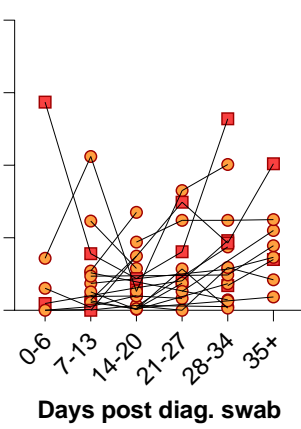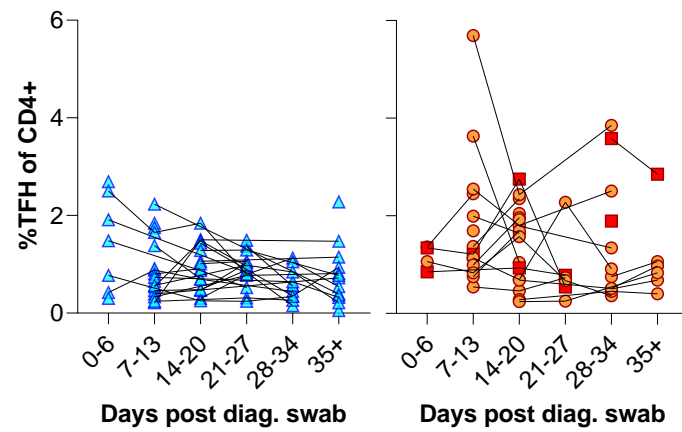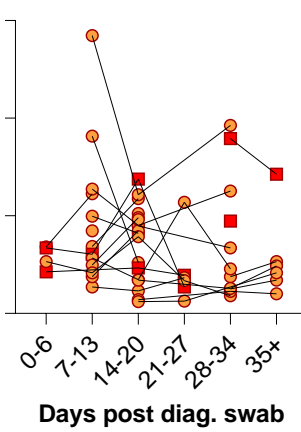

Supplement: supp [file elife-79924-supp-v1.zip]

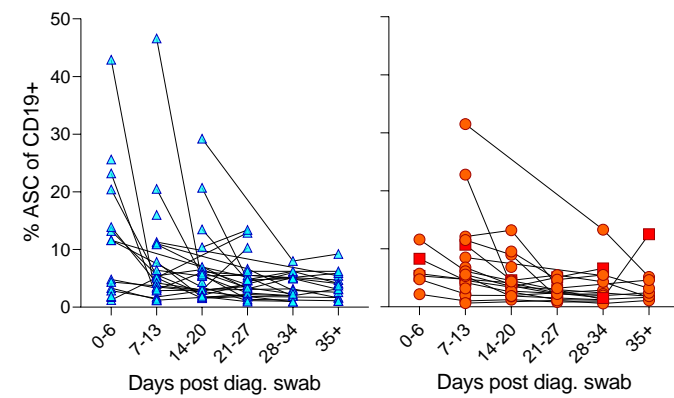

Supplement: supp [file elife-79924-supp-v1.zip]

CD40

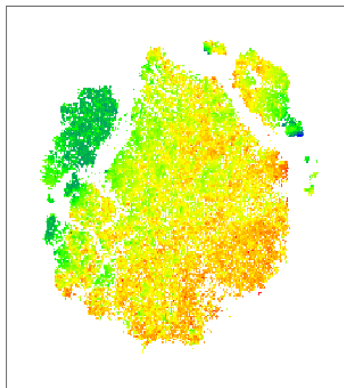

CD19

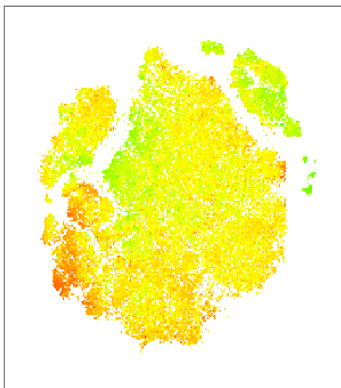

CD138

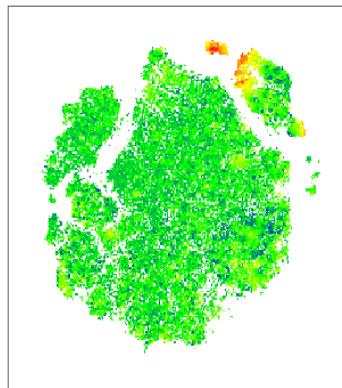

CD38

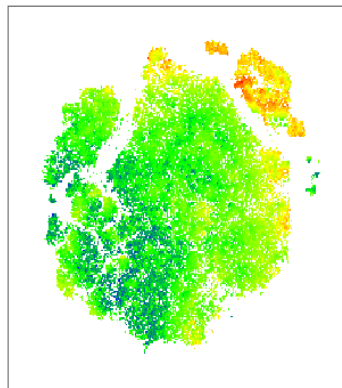

CD69

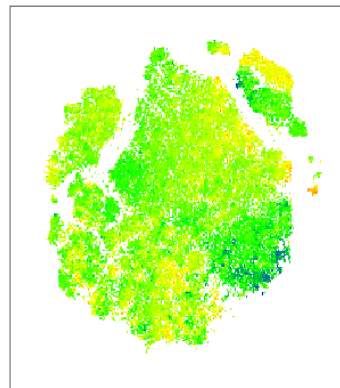

CD10

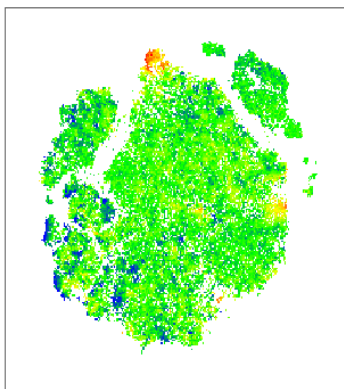

IgM

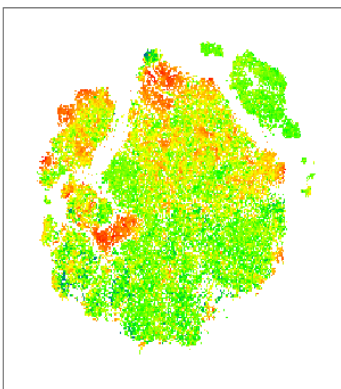

IgD

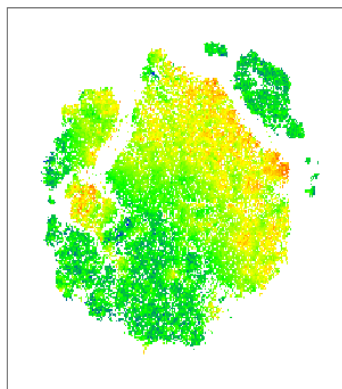

CD20

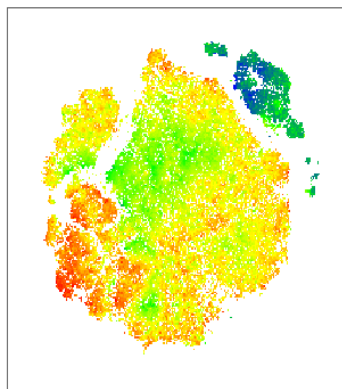

CD21

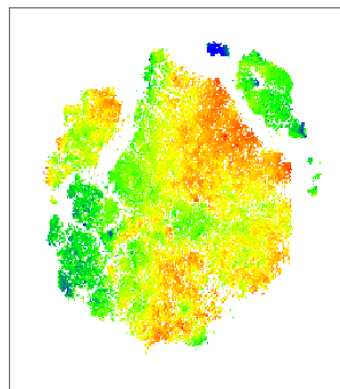

CD27

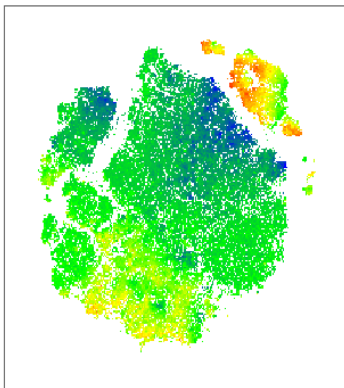

CD95

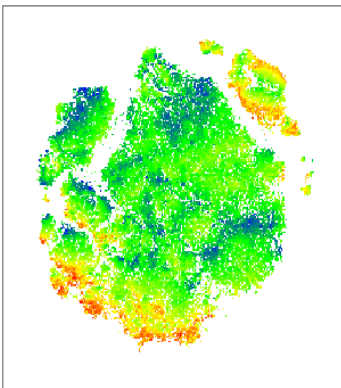

hi

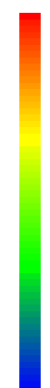

lo

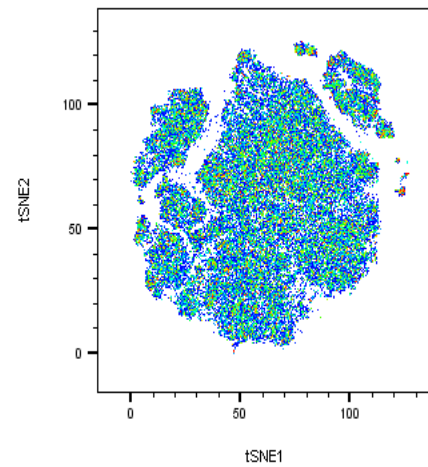

Supplement: supp [file elife-79924-supp-v1.zip]

A (i)

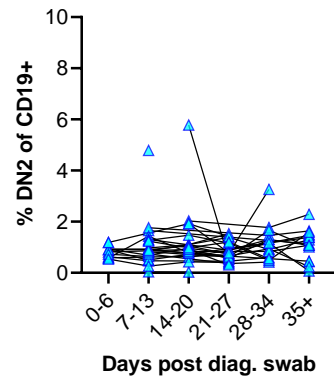

(ii)

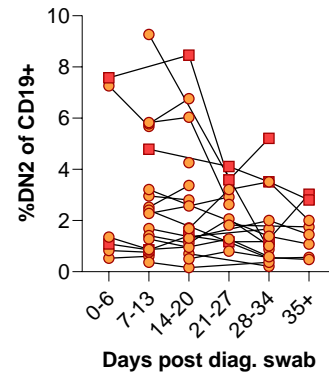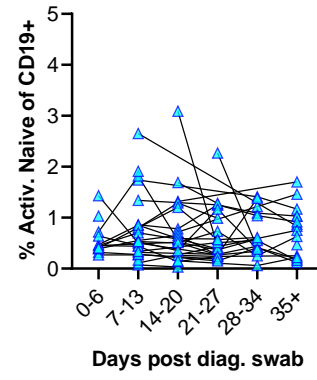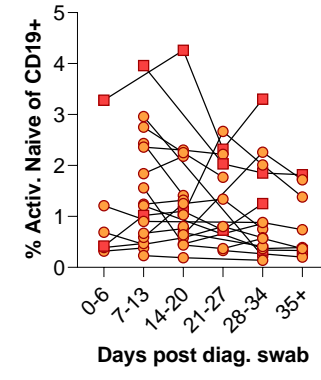

B

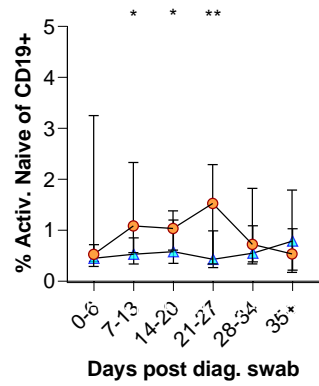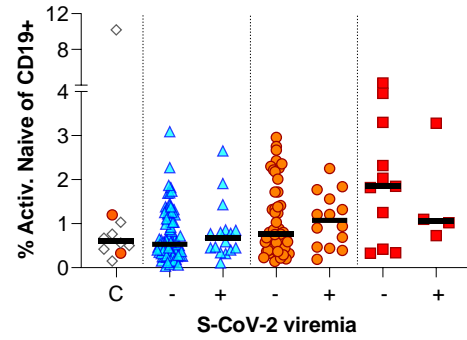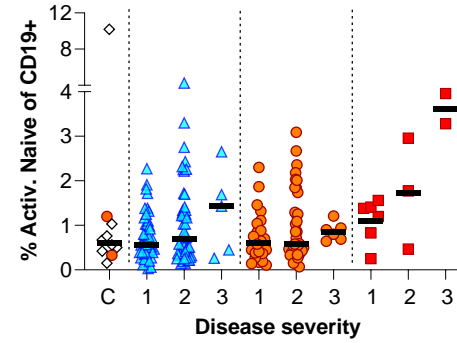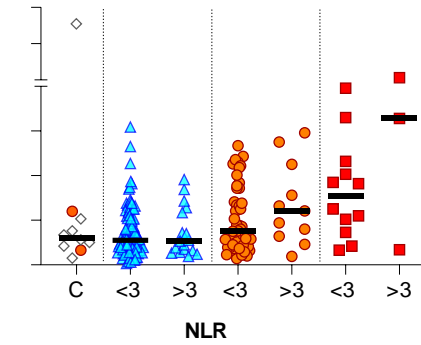

C

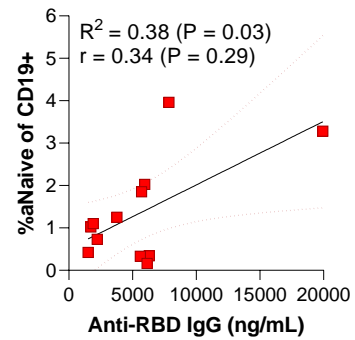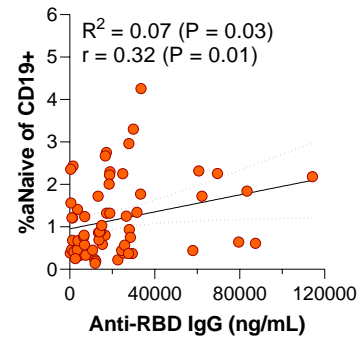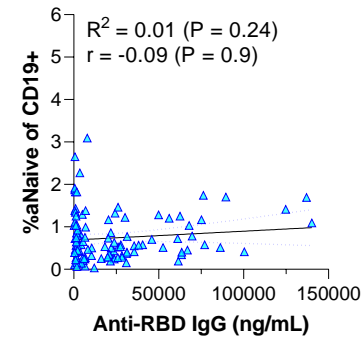

◇ Control  
 ▲ HIV-  
 ● HIV+ suppressed  
 ■ HIV+ viremic

Supplement: supp [file elife-79924-supp-v1.zip]

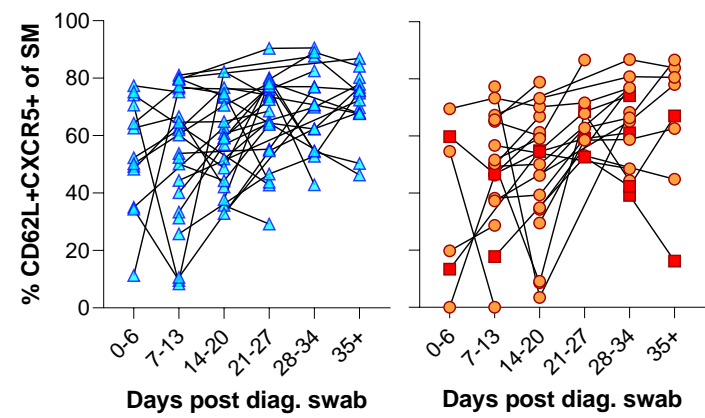

Supplement: supp [file elife-79924-supp-v1.zip]

CD40

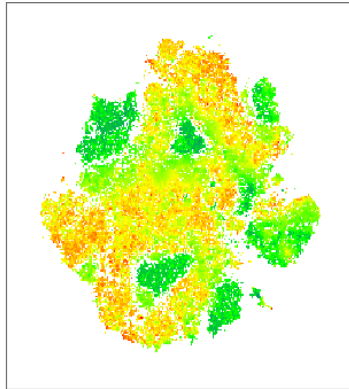

CD19

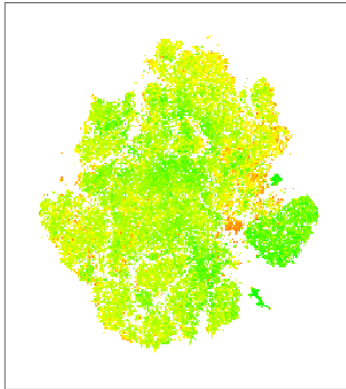

CD38

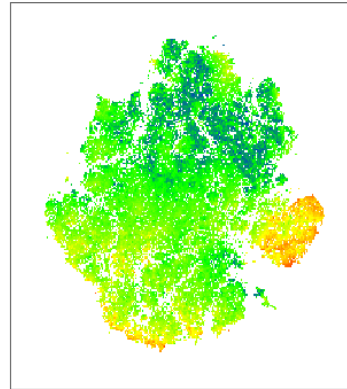

CD27

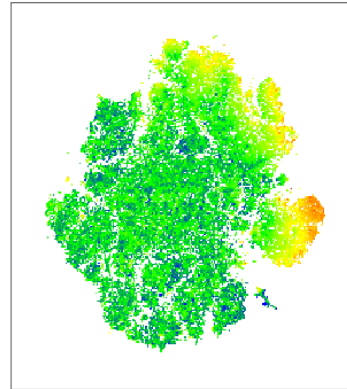

IgM

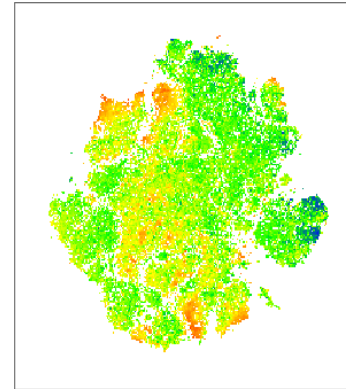

PDL1

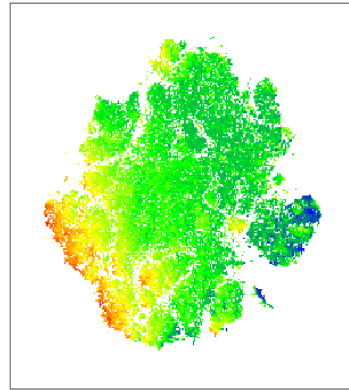

IgD

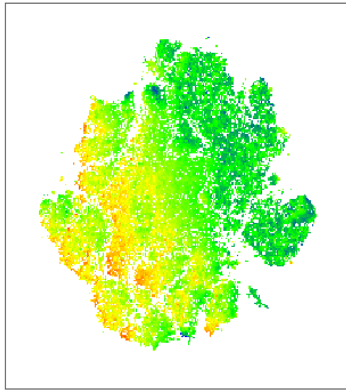

CD5

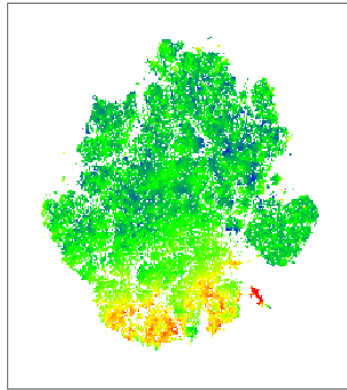

CD178

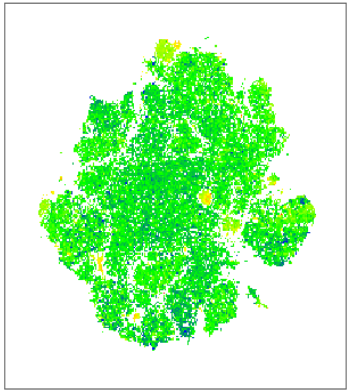

CD24

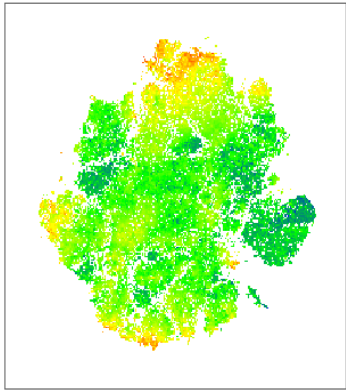

CD1d

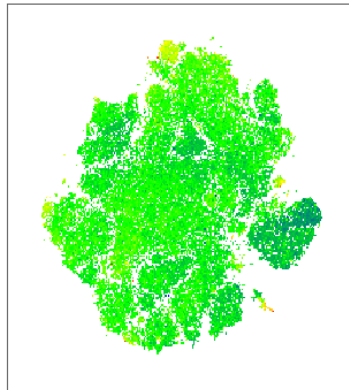

CD86

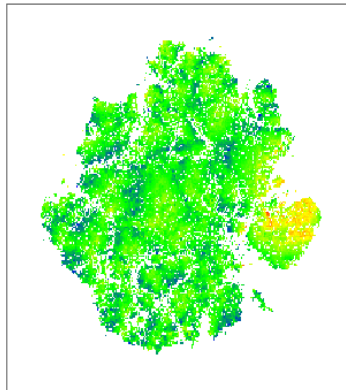

hi

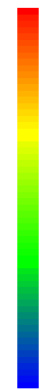

lo

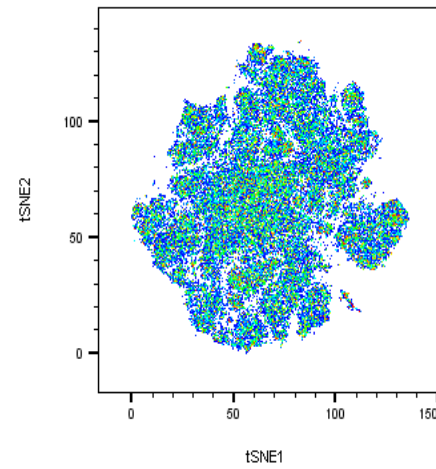

Supplement: supp [file elife-79924-supp-v1.zip]

CD19

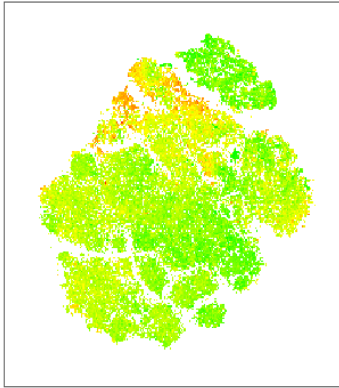

CXCR4

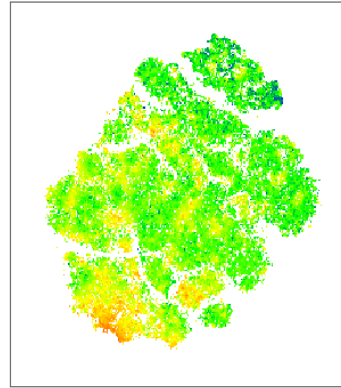

CD38

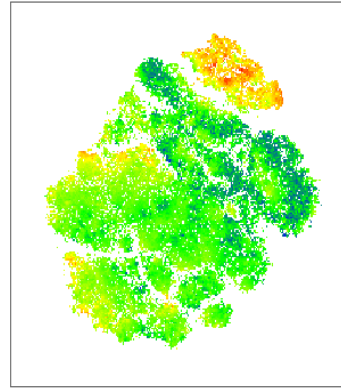

CD69

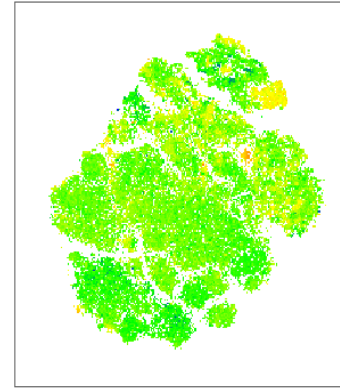

CD62L

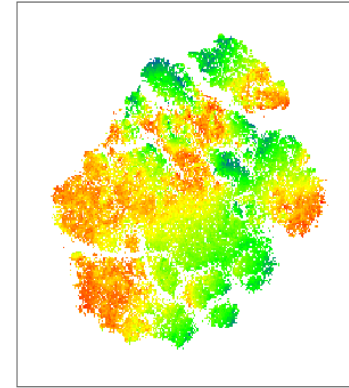

IgM

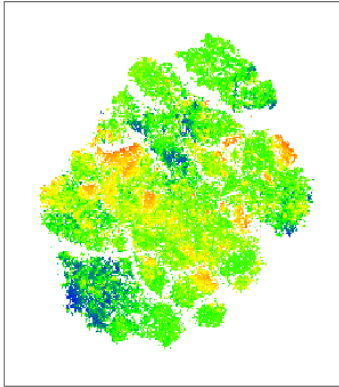

CCR7

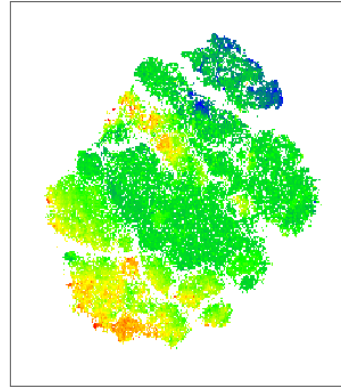

IgD

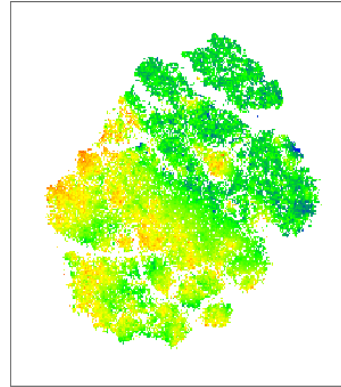

CXCR3

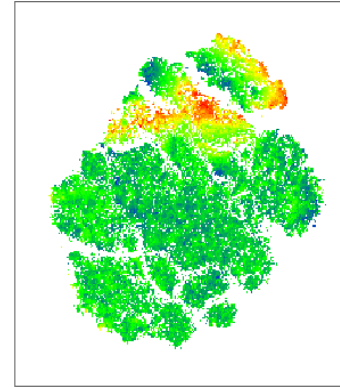

CCR6

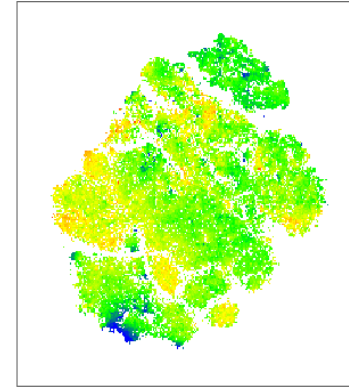

CXCR5

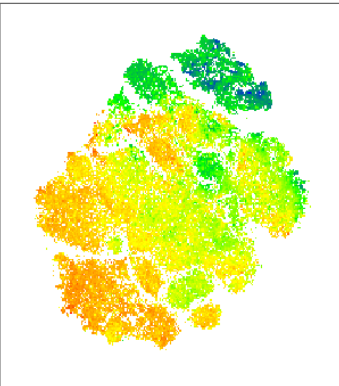

CD27

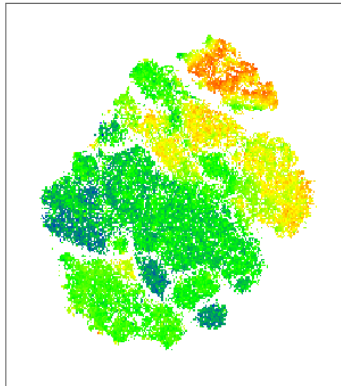

hi

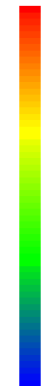

lo

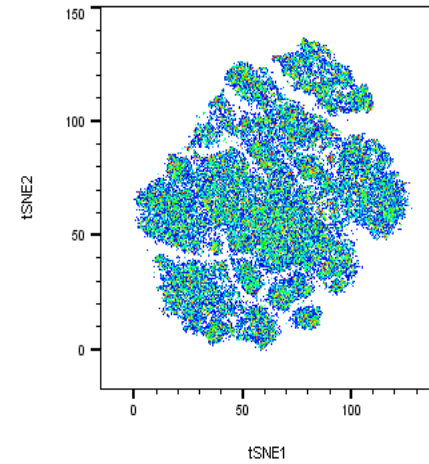

Supplement: supp [file elife-79924-supp-v1.zip]
